# Supplementary material for: Downregulation of enhancer RNA EMX2OS is associated with poor prognosis in kidney renal clear cell carcinoma
Source: Aging (Albany NY). 2020 Nov 25;12(24):25865–77. doi: 10.18632/aging.202151 (PMC7803531; doi:10.18632/aging.202151)
Supplement: Supplementary Table 1 [file aging-12-202151-s001.xls]

## Sheet: Table S1
Supplementary Table 1. Significantly co-expressed genes with EMX2OS in KIRC
eRNA	Co-expressed genes	correlation coefficient r	Spearman p-value
EMX2OS	PIGV	0.533	< 0.001
EMX2OS	RMND5A	0.55	< 0.001
EMX2OS	COLCA1	0.528	< 0.001
EMX2OS	SLC45A4	0.409	< 0.001
EMX2OS	ENTPD1-AS1	0.46	< 0.001
EMX2OS	SEPSECS	0.526	< 0.001
EMX2OS	LINC02061	0.544	< 0.001
EMX2OS	RAD17	0.43	< 0.001
EMX2OS	RN7SL541P	0.404	< 0.001
EMX2OS	PTPRB	0.462	< 0.001
EMX2OS	AMN	0.435	< 0.001
EMX2OS	STPG1	0.41	< 0.001
EMX2OS	VRK3	0.462	< 0.001
EMX2OS	AC104825.1	0.453	< 0.001
EMX2OS	RCOR1	0.436	< 0.001
EMX2OS	GRAMD1C	0.521	< 0.001
EMX2OS	KIAA1328	0.508	< 0.001
EMX2OS	OTUD1	0.469	< 0.001
EMX2OS	TTC5	0.475	< 0.001
EMX2OS	LINC02747	0.427	< 0.001
EMX2OS	WWC2-AS2	0.465	< 0.001
EMX2OS	AC005261.1	0.441	< 0.001
EMX2OS	ACOX2	0.484	< 0.001
EMX2OS	HSDL2	0.428	< 0.001
EMX2OS	SMARCC2	0.473	< 0.001
EMX2OS	ZBTB21	0.407	< 0.001
EMX2OS	RNF5	0.481	< 0.001
EMX2OS	RIC8B	0.429	< 0.001
EMX2OS	DHDDS	0.421	< 0.001
EMX2OS	AGXT2	0.447	< 0.001
EMX2OS	DHX15	0.484	< 0.001
EMX2OS	AL031722.1	0.443	< 0.001
EMX2OS	MMUT	0.574	< 0.001
EMX2OS	ZDHHC6	0.587	< 0.001
EMX2OS	STX17	0.46	< 0.001
EMX2OS	ZNF566	0.444	< 0.001
EMX2OS	SYNJ1	0.422	< 0.001
EMX2OS	ZNF132	0.503	< 0.001
EMX2OS	SLC5A10	0.473	< 0.001
EMX2OS	CRB3	0.517	< 0.001
EMX2OS	ECHDC3	0.472	< 0.001
EMX2OS	DDR1	0.436	< 0.001
EMX2OS	ZNF780A	0.423	< 0.001
EMX2OS	GULOP	0.473	< 0.001
EMX2OS	PPARA	0.581	< 0.001
EMX2OS	ZNF778	0.469	< 0.001
EMX2OS	SGCB	0.499	< 0.001
EMX2OS	UPF2	0.41	< 0.001
EMX2OS	AL021920.2	0.427	< 0.001
EMX2OS	ERO1B	0.433	< 0.001
EMX2OS	AC026780.2	0.414	< 0.001
EMX2OS	IGF1R	0.59	< 0.001
EMX2OS	ZNF318	0.453	< 0.001
EMX2OS	CLBA1	0.402	< 0.001
EMX2OS	EXTL2	0.406	< 0.001
EMX2OS	SORBS2	0.477	< 0.001
EMX2OS	PIGO	0.422	< 0.001
EMX2OS	AC021483.2	0.493	< 0.001
EMX2OS	CPT2	0.511	< 0.001
EMX2OS	KIF1B	0.586	< 0.001
EMX2OS	AC124312.2	0.461	< 0.001
EMX2OS	MFN2	0.438	< 0.001
EMX2OS	RBMS2	0.47	< 0.001
EMX2OS	GCNT2	0.423	< 0.001
EMX2OS	DCAF7	0.406	< 0.001
EMX2OS	CDS2	0.472	< 0.001
EMX2OS	AP000766.1	0.407	< 0.001
EMX2OS	ANKRD42	0.451	< 0.001
EMX2OS	TMEM232	0.464	< 0.001
EMX2OS	PRX	0.451	< 0.001
EMX2OS	HSPA1L	0.464	< 0.001
EMX2OS	ACAD8	0.436	< 0.001
EMX2OS	PCBP1	0.527	< 0.001
EMX2OS	TAF3	0.407	< 0.001
EMX2OS	PLEKHM3	0.419	< 0.001
EMX2OS	CIZ1	0.402	< 0.001
EMX2OS	OARD1	0.441	< 0.001
EMX2OS	AKR1C1	0.449	< 0.001
EMX2OS	LSM14A	0.522	< 0.001
EMX2OS	POMT1	0.512	< 0.001
EMX2OS	CCDC85A	0.467	< 0.001
EMX2OS	VIPR1	0.417	< 0.001
EMX2OS	DRAIC	0.418	< 0.001
EMX2OS	FKTN	0.484	< 0.001
EMX2OS	SALL1	0.615	< 0.001
EMX2OS	CA4	0.543	< 0.001
EMX2OS	FREM2	0.678	< 0.001
EMX2OS	ADNP2	0.453	< 0.001
EMX2OS	PHF3	0.477	< 0.001
EMX2OS	CYS1	0.621	< 0.001
EMX2OS	KLHL9	0.518	< 0.001
EMX2OS	KIAA1614	0.562	< 0.001
EMX2OS	AC053527.2	0.413	< 0.001
EMX2OS	AC104794.5	0.527	< 0.001
EMX2OS	DNAJC28	0.448	< 0.001
EMX2OS	RRAGD	0.429	< 0.001
EMX2OS	LIPE	0.477	< 0.001
EMX2OS	LINC02027	0.415	< 0.001
EMX2OS	IDNK	0.429	< 0.001
EMX2OS	PTPRM	0.471	< 0.001
EMX2OS	OR7E47P	0.529	< 0.001
EMX2OS	KATNA1	0.411	< 0.001
EMX2OS	TJP2	0.581	< 0.001
EMX2OS	ABCG2	0.441	< 0.001
EMX2OS	NPR3	0.627	< 0.001
EMX2OS	AL138826.1	0.455	< 0.001
EMX2OS	SIRT1	0.513	< 0.001
EMX2OS	TEKT2	0.424	< 0.001
EMX2OS	TFEC	0.401	< 0.001
EMX2OS	RAB3GAP2	0.411	< 0.001
EMX2OS	TCTA	0.521	< 0.001
EMX2OS	GLYAT	0.466	< 0.001
EMX2OS	SMG6	0.499	< 0.001
EMX2OS	AC005871.1	0.48	< 0.001
EMX2OS	ATG2B	0.433	< 0.001
EMX2OS	ILDR2	0.414	< 0.001
EMX2OS	AC026780.1	0.458	< 0.001
EMX2OS	AL354696.2	0.438	< 0.001
EMX2OS	LINC02569	0.409	< 0.001
EMX2OS	SLC25A48	0.558	< 0.001
EMX2OS	OPA3	0.526	< 0.001
EMX2OS	ZKSCAN8	0.435	< 0.001
EMX2OS	ACVR2B	0.448	< 0.001
EMX2OS	BCL2L2	0.543	< 0.001
EMX2OS	UBE4A	0.418	< 0.001
EMX2OS	CTDSPL	0.489	< 0.001
EMX2OS	RUNDC1	0.434	< 0.001
EMX2OS	DYNLL2	0.558	< 0.001
EMX2OS	EPB41L4A-DT	0.452	< 0.001
EMX2OS	PCK1	0.497	< 0.001
EMX2OS	ZNF821	0.609	< 0.001
EMX2OS	SNAPC3	0.494	< 0.001
EMX2OS	TRMT5	0.457	< 0.001
EMX2OS	GCLC	0.417	< 0.001
EMX2OS	RNF170	0.452	< 0.001
EMX2OS	FBP1	0.443	< 0.001
EMX2OS	BRMS1L	0.431	< 0.001
EMX2OS	TTC37	0.444	< 0.001
EMX2OS	IFIT5	0.407	< 0.001
EMX2OS	EXD2	0.417	< 0.001
EMX2OS	ASAH2B	0.437	< 0.001
EMX2OS	MFSD4A	0.463	< 0.001
EMX2OS	CIRBP	0.487	< 0.001
EMX2OS	ZNF684	0.454	< 0.001
EMX2OS	CWC25	0.502	< 0.001
EMX2OS	TRIM7	0.429	< 0.001
EMX2OS	TEF	0.51	< 0.001
EMX2OS	USP30	0.475	< 0.001
EMX2OS	RNF214	0.464	< 0.001
EMX2OS	CLSTN1	0.477	< 0.001
EMX2OS	RGL1	0.474	< 0.001
EMX2OS	ZNF583	0.403	< 0.001
EMX2OS	UNC119B	0.471	< 0.001
EMX2OS	ZNF585A	0.421	< 0.001
EMX2OS	SLC22A12	0.578	< 0.001
EMX2OS	PHC1	0.495	< 0.001
EMX2OS	IGIP	0.404	< 0.001
EMX2OS	C8orf37	0.503	< 0.001
EMX2OS	MPL	0.535	< 0.001
EMX2OS	AC097376.3	0.422	< 0.001
EMX2OS	TTC12	0.483	< 0.001
EMX2OS	TBC1D22B	0.464	< 0.001
EMX2OS	AFTPH	0.531	< 0.001
EMX2OS	ZNF782	0.532	< 0.001
EMX2OS	NAF1	0.406	< 0.001
EMX2OS	EPB41L5	0.667	< 0.001
EMX2OS	ENTPD8	0.44	< 0.001
EMX2OS	TACC1	0.442	< 0.001
EMX2OS	PTPRA	0.42	< 0.001
EMX2OS	AC093249.3	0.414	< 0.001
EMX2OS	SLC41A1	0.519	< 0.001
EMX2OS	TOB1	0.419	< 0.001
EMX2OS	NUDT7	0.504	< 0.001
EMX2OS	ARHGEF16	0.417	< 0.001
EMX2OS	ARHGAP42	0.439	< 0.001
EMX2OS	MAPK8IP1	0.486	< 0.001
EMX2OS	AP3S2	0.402	< 0.001
EMX2OS	DHFR2	0.499	< 0.001
EMX2OS	KYAT1	0.431	< 0.001
EMX2OS	LGR4	0.517	< 0.001
EMX2OS	AKAP9	0.434	< 0.001
EMX2OS	ZNF470	0.536	< 0.001
EMX2OS	ACSM2A	0.438	< 0.001
EMX2OS	AC018809.2	0.443	< 0.001
EMX2OS	AP001627.1	0.41	< 0.001
EMX2OS	VWA7	0.502	< 0.001
EMX2OS	DMXL1	0.416	< 0.001
EMX2OS	VIPAS39	0.473	< 0.001
EMX2OS	FAM227B	0.479	< 0.001
EMX2OS	MARCHF8	0.555	< 0.001
EMX2OS	CTCF	0.448	< 0.001
EMX2OS	EIF4ENIF1	0.478	< 0.001
EMX2OS	KAT6B	0.492	< 0.001
EMX2OS	MTHFR	0.524	< 0.001
EMX2OS	TMEM80	0.407	< 0.001
EMX2OS	KAT5	0.652	< 0.001
EMX2OS	SLC22A24	0.662	< 0.001
EMX2OS	PEX3	0.41	< 0.001
EMX2OS	PCLO	0.448	< 0.001
EMX2OS	NHLRC2	0.476	< 0.001
EMX2OS	AP000866.4	0.422	< 0.001
EMX2OS	MTURN	0.476	< 0.001
EMX2OS	AC087741.3	0.504	< 0.001
EMX2OS	XPA	0.508	< 0.001
EMX2OS	ZNF440	0.492	< 0.001
EMX2OS	GNA11	0.413	< 0.001
EMX2OS	DCTN1	0.591	< 0.001
EMX2OS	SLC22A2	0.449	< 0.001
EMX2OS	ILF3-DT	0.423	< 0.001
EMX2OS	THRA	0.656	< 0.001
EMX2OS	YWHAE	0.428	< 0.001
EMX2OS	CRYZ	0.422	< 0.001
EMX2OS	EXOC7	0.508	< 0.001
EMX2OS	BPNT1	0.418	< 0.001
EMX2OS	MLLT10	0.459	< 0.001
EMX2OS	PCBD2	0.414	< 0.001
EMX2OS	SPATA18	0.561	< 0.001
EMX2OS	WDR19	0.427	< 0.001
EMX2OS	ALDH3A2	0.716	< 0.001
EMX2OS	SFTPD	0.404	< 0.001
EMX2OS	ZSCAN21	0.403	< 0.001
EMX2OS	AL022345.3	0.498	< 0.001
EMX2OS	SLC25A42	0.481	< 0.001
EMX2OS	KIAA1109	0.543	< 0.001
EMX2OS	ATP5F1A	0.433	< 0.001
EMX2OS	CCDC89	0.44	< 0.001
EMX2OS	CCDC47	0.423	< 0.001
EMX2OS	RELCH	0.47	< 0.001
EMX2OS	TAL2	0.577	< 0.001
EMX2OS	AL133355.1	0.597	< 0.001
EMX2OS	DMTN	0.409	< 0.001
EMX2OS	NAA30	0.409	< 0.001
EMX2OS	RN7SKP275	0.404	< 0.001
EMX2OS	LINC02538	0.435	< 0.001
EMX2OS	AC002401.1	0.479	< 0.001
EMX2OS	CLASP2	0.403	< 0.001
EMX2OS	JUP	0.463	< 0.001
EMX2OS	TRPM3	0.696	< 0.001
EMX2OS	KCNJ3	0.434	< 0.001
EMX2OS	TBC1D19	0.544	< 0.001
EMX2OS	ARHGEF28	0.548	< 0.001
EMX2OS	RAB40B	0.49	< 0.001
EMX2OS	PGBD4P3	0.421	< 0.001
EMX2OS	FUBP3	0.465	< 0.001
EMX2OS	LINC02021	0.412	< 0.001
EMX2OS	GLYR1	0.469	< 0.001
EMX2OS	RNFT1P2	0.416	< 0.001
EMX2OS	TUT4	0.464	< 0.001
EMX2OS	OTUD6B-AS1	0.432	< 0.001
EMX2OS	PEBP1	0.466	< 0.001
EMX2OS	EPHX2	0.578	< 0.001
EMX2OS	ZNF774	0.419	< 0.001
EMX2OS	LINC01942	0.422	< 0.001
EMX2OS	TNFSF13	0.494	< 0.001
EMX2OS	TRIM23	0.44	< 0.001
EMX2OS	NBEA	0.401	< 0.001
EMX2OS	BCL9	0.413	< 0.001
EMX2OS	AL137847.1	0.402	< 0.001
EMX2OS	FCHO2	0.431	< 0.001
EMX2OS	COQ7	0.435	< 0.001
EMX2OS	SENP8	0.574	< 0.001
EMX2OS	HIF1AN	0.427	< 0.001
EMX2OS	MAGEE1	0.412	< 0.001
EMX2OS	SEPTIN10	0.513	< 0.001
EMX2OS	RLN2	0.407	< 0.001
EMX2OS	CLCN3	0.407	< 0.001
EMX2OS	METTL16	0.479	< 0.001
EMX2OS	ATP8A1	0.462	< 0.001
EMX2OS	LINC02447	0.449	< 0.001
EMX2OS	LRP5	0.577	< 0.001
EMX2OS	HNF1A-AS1	0.438	< 0.001
EMX2OS	GKAP1	0.477	< 0.001
EMX2OS	STOX2	0.514	< 0.001
EMX2OS	LINC00472	0.535	< 0.001
EMX2OS	TBL1X	0.584	< 0.001
EMX2OS	TRAPPC8	0.495	< 0.001
EMX2OS	TUB-AS1	0.448	< 0.001
EMX2OS	AL353801.2	0.5	< 0.001
EMX2OS	PRKD1	0.606	< 0.001
EMX2OS	ZXDA	0.473	< 0.001
EMX2OS	CFAP43	0.404	< 0.001
EMX2OS	TMEM125	0.506	< 0.001
EMX2OS	BTNL9	0.543	< 0.001
EMX2OS	TMEM245	0.507	< 0.001
EMX2OS	MLLT6	0.444	< 0.001
EMX2OS	NCR3LG1	0.584	< 0.001
EMX2OS	AL662844.4	0.402	< 0.001
EMX2OS	ATP6V1D	0.404	< 0.001
EMX2OS	VPS35L	0.552	< 0.001
EMX2OS	NECTIN3	0.402	< 0.001
EMX2OS	B3GNT10	0.401	< 0.001
EMX2OS	TRAF6	0.526	< 0.001
EMX2OS	STXBP3	0.49	< 0.001
EMX2OS	TXNDC16	0.532	< 0.001
EMX2OS	AP001542.3	0.646	< 0.001
EMX2OS	ZNF264	0.403	< 0.001
EMX2OS	AC012313.9	0.421	< 0.001
EMX2OS	ASRGL1	0.439	< 0.001
EMX2OS	DDO	0.412	< 0.001
EMX2OS	EDAR	0.541	< 0.001
EMX2OS	AQP4-AS1	0.42	< 0.001
EMX2OS	LINC00910	0.408	< 0.001
EMX2OS	HIF1A-AS3	0.437	< 0.001
EMX2OS	PPIG	0.407	< 0.001
EMX2OS	SALL2	0.436	< 0.001
EMX2OS	CRYM	0.404	< 0.001
EMX2OS	OXCT1-AS1	0.469	< 0.001
EMX2OS	TCF7L2	0.512	< 0.001
EMX2OS	MAP7	0.677	< 0.001
EMX2OS	SETBP1	0.431	< 0.001
EMX2OS	UBE4B	0.504	< 0.001
EMX2OS	ARID4A	0.56	< 0.001
EMX2OS	SMTNL2	0.577	< 0.001
EMX2OS	ACLY	0.417	< 0.001
EMX2OS	LINC02532	0.454	< 0.001
EMX2OS	AC092802.2	0.416	< 0.001
EMX2OS	RALGAPA1P1	0.558	< 0.001
EMX2OS	ARHGEF10L	0.528	< 0.001
EMX2OS	PPP1R13B	0.565	< 0.001
EMX2OS	LINC02754	0.508	< 0.001
EMX2OS	DOCK8-AS1	0.414	< 0.001
EMX2OS	ABCA5	0.442	< 0.001
EMX2OS	ITSN2	0.464	< 0.001
EMX2OS	EP300	0.479	< 0.001
EMX2OS	MTMR11	0.473	< 0.001
EMX2OS	LINC01550	0.538	< 0.001
EMX2OS	MOB3B	0.55	< 0.001
EMX2OS	LRRC47	0.482	< 0.001
EMX2OS	GARNL3	0.437	< 0.001
EMX2OS	METTL7A	0.533	< 0.001
EMX2OS	PKHD1	0.72	< 0.001
EMX2OS	INTU	0.404	< 0.001
EMX2OS	MAN1B1-DT	0.409	< 0.001
EMX2OS	AL158071.5	0.539	< 0.001
EMX2OS	ZNF763	0.422	< 0.001
EMX2OS	CSTF2T	0.458	< 0.001
EMX2OS	LRRC19	0.409	< 0.001
EMX2OS	RSPH3	0.472	< 0.001
EMX2OS	TCEA3	0.407	< 0.001
EMX2OS	LINC01510	0.406	< 0.001
EMX2OS	ATXN7L3B	0.53	< 0.001
EMX2OS	LGALSL-DT	0.427	< 0.001
EMX2OS	FBXL16	0.538	< 0.001
EMX2OS	GATM	0.564	< 0.001
EMX2OS	SEC24B	0.445	< 0.001
EMX2OS	AMD1	0.51	< 0.001
EMX2OS	SLC5A12	0.412	< 0.001
EMX2OS	CCDC121	0.546	< 0.001
EMX2OS	INSR	0.473	< 0.001
EMX2OS	ACAT1	0.562	< 0.001
EMX2OS	PEX19	0.406	< 0.001
EMX2OS	MTMR12	0.519	< 0.001
EMX2OS	HOOK1	0.666	< 0.001
EMX2OS	ZNF615	0.419	< 0.001
EMX2OS	MINDY2	0.412	< 0.001
EMX2OS	NDRG2	0.512	< 0.001
EMX2OS	NFX1	0.505	< 0.001
EMX2OS	NSUN7	0.452	< 0.001
EMX2OS	CUBN	0.488	< 0.001
EMX2OS	AC116345.3	0.498	< 0.001
EMX2OS	SLC22A23	0.405	< 0.001
EMX2OS	FAAH	0.507	< 0.001
EMX2OS	ARL3	0.497	< 0.001
EMX2OS	RAPGEF4	0.409	< 0.001
EMX2OS	ZHX3	0.519	< 0.001
EMX2OS	AC026992.1	0.503	< 0.001
EMX2OS	SWT1	0.606	< 0.001
EMX2OS	CBX6	0.406	< 0.001
EMX2OS	ZNF33B	0.589	< 0.001
EMX2OS	H2AC2P	0.424	< 0.001
EMX2OS	DHTKD1	0.415	< 0.001
EMX2OS	TMEM252-DT	0.542	< 0.001
EMX2OS	SLC47A1P2	0.452	< 0.001
EMX2OS	MCCC1	0.425	< 0.001
EMX2OS	GID4	0.494	< 0.001
EMX2OS	SH3D19	0.459	< 0.001
EMX2OS	CASTOR3	0.41	< 0.001
EMX2OS	FPGT	0.409	< 0.001
EMX2OS	AQP4	0.415	< 0.001
EMX2OS	APBB1	0.627	< 0.001
EMX2OS	MTREX	0.408	< 0.001
EMX2OS	CREBRF	0.464	< 0.001
EMX2OS	AC118553.1	0.412	< 0.001
EMX2OS	PRPF38A	0.518	< 0.001
EMX2OS	PHLDB2	0.402	< 0.001
EMX2OS	AC117489.1	0.516	< 0.001
EMX2OS	LRRK2	0.535	< 0.001
EMX2OS	CDS1	0.59	< 0.001
EMX2OS	BHLHB9	0.518	< 0.001
EMX2OS	NDUFS1	0.465	< 0.001
EMX2OS	EVC2	0.463	< 0.001
EMX2OS	TMED8	0.553	< 0.001
EMX2OS	TMTC2	0.495	< 0.001
EMX2OS	AL590428.1	0.417	< 0.001
EMX2OS	AL008707.1	0.481	< 0.001
EMX2OS	AC011477.3	0.427	< 0.001
EMX2OS	PIK3C3	0.562	< 0.001
EMX2OS	POLDIP3	0.462	< 0.001
EMX2OS	AC098484.1	0.526	< 0.001
EMX2OS	HSD17B8	0.488	< 0.001
EMX2OS	ZBTB40	0.476	< 0.001
EMX2OS	TMEM107	0.447	< 0.001
EMX2OS	FBXL3	0.466	< 0.001
EMX2OS	FITM2	0.485	< 0.001
EMX2OS	SPTLC3	0.429	< 0.001
EMX2OS	SLC22A11	0.606	< 0.001
EMX2OS	ASPA	0.494	< 0.001
EMX2OS	LRATD2	0.467	< 0.001
EMX2OS	SFXN1	0.432	< 0.001
EMX2OS	ZFP3	0.477	< 0.001
EMX2OS	ACSM2B	0.461	< 0.001
EMX2OS	DPY19L2P2	0.521	< 0.001
EMX2OS	NBEAL1	0.415	< 0.001
EMX2OS	EVC	0.636	< 0.001
EMX2OS	FAN1	0.475	< 0.001
EMX2OS	LARGE2	0.534	< 0.001
EMX2OS	SH3BP4	0.485	< 0.001
EMX2OS	CBX7	0.625	< 0.001
EMX2OS	AC012313.4	0.445	< 0.001
EMX2OS	LINC02471	0.414	< 0.001
EMX2OS	STAG2	0.43	< 0.001
EMX2OS	SLC12A6	0.416	< 0.001
EMX2OS	MBD1	0.479	< 0.001
EMX2OS	PELI3	0.403	< 0.001
EMX2OS	AC009086.2	0.422	< 0.001
EMX2OS	SNX2	0.42	< 0.001
EMX2OS	FAM122A	0.501	< 0.001
EMX2OS	LRRC37A16P	0.446	< 0.001
EMX2OS	A1CF	0.534	< 0.001
EMX2OS	AC005699.1	0.409	< 0.001
EMX2OS	SF1	0.516	< 0.001
EMX2OS	CCDC186	0.538	< 0.001
EMX2OS	SLC25A4	0.513	< 0.001
EMX2OS	ABHD1	0.478	< 0.001
EMX2OS	CGRRF1	0.418	< 0.001
EMX2OS	NEK9	0.421	< 0.001
EMX2OS	ING3	0.428	< 0.001
EMX2OS	RBM23	0.461	< 0.001
EMX2OS	FAM126B	0.419	< 0.001
EMX2OS	PPP6C	0.43	< 0.001
EMX2OS	ZNF346	0.456	< 0.001
EMX2OS	AC104211.2	0.491	< 0.001
EMX2OS	ZNF396	0.507	< 0.001
EMX2OS	AC073346.1	0.547	< 0.001
EMX2OS	TPPP	0.494	< 0.001
EMX2OS	ADAMTS9-AS2	0.52	< 0.001
EMX2OS	WBP4	0.528	< 0.001
EMX2OS	ITPRID2	0.546	< 0.001
EMX2OS	ANKRD27	0.499	< 0.001
EMX2OS	VPS26C	0.465	< 0.001
EMX2OS	RCBTB1	0.506	< 0.001
EMX2OS	VPS13D	0.447	< 0.001
EMX2OS	AC010136.1	0.439	< 0.001
EMX2OS	LEO1	0.405	< 0.001
EMX2OS	CYB5D2	0.411	< 0.001
EMX2OS	POLR2A	0.469	< 0.001
EMX2OS	DNAJC11	0.481	< 0.001
EMX2OS	CX3CL1	0.565	< 0.001
EMX2OS	SMC3	0.482	< 0.001
EMX2OS	AC064807.1	0.402	< 0.001
EMX2OS	DFFA	0.551	< 0.001
EMX2OS	AVPR1B	0.556	< 0.001
EMX2OS	ALDH9A1	0.494	< 0.001
EMX2OS	LRP6	0.523	< 0.001
EMX2OS	NAA35	0.45	< 0.001
EMX2OS	ALAD	0.55	< 0.001
EMX2OS	FAM171A1	0.449	< 0.001
EMX2OS	EIF3J-DT	0.573	< 0.001
EMX2OS	RNF38	0.537	< 0.001
EMX2OS	EML5	0.439	< 0.001
EMX2OS	FAM149B1	0.499	< 0.001
EMX2OS	ARID5B	0.419	< 0.001
EMX2OS	PCCA	0.682	< 0.001
EMX2OS	AL162377.1	0.471	< 0.001
EMX2OS	UBAP2	0.473	< 0.001
EMX2OS	AC005332.6	0.458	< 0.001
EMX2OS	FUT11	0.466	< 0.001
EMX2OS	RNA5SP46	0.432	< 0.001
EMX2OS	GHDC	0.404	< 0.001
EMX2OS	NMNAT1	0.503	< 0.001
EMX2OS	ZNF383	0.405	< 0.001
EMX2OS	ACACB	0.413	< 0.001
EMX2OS	GGT1	0.439	< 0.001
EMX2OS	AL078644.2	0.427	< 0.001
EMX2OS	BPTF	0.405	< 0.001
EMX2OS	AC108449.2	0.469	< 0.001
EMX2OS	ENAM	0.592	< 0.001
EMX2OS	RAB11FIP2	0.596	< 0.001
EMX2OS	BAIAP2-DT	0.472	< 0.001
EMX2OS	ZNF280D	0.448	< 0.001
EMX2OS	WASHC2C	0.446	< 0.001
EMX2OS	FBXL4	0.515	< 0.001
EMX2OS	LINC01697	0.432	< 0.001
EMX2OS	ZC2HC1A	0.437	< 0.001
EMX2OS	CEP68	0.479	< 0.001
EMX2OS	CALCOCO2	0.408	< 0.001
EMX2OS	EPHA4	0.519	< 0.001
EMX2OS	CIPC	0.484	< 0.001
EMX2OS	SLC6A3	0.409	< 0.001
EMX2OS	EDRF1-DT	0.546	< 0.001
EMX2OS	DIRAS2	0.507	< 0.001
EMX2OS	AQP1	0.484	< 0.001
EMX2OS	CASC3	0.437	< 0.001
EMX2OS	MRPS9	0.431	< 0.001
EMX2OS	TRMT61B	0.428	< 0.001
EMX2OS	CLIC4	0.482	< 0.001
EMX2OS	NOSTRIN	0.465	< 0.001
EMX2OS	ATP7B	0.574	< 0.001
EMX2OS	OXSR1	0.477	< 0.001
EMX2OS	MED21	0.446	< 0.001
EMX2OS	ZADH2	0.459	< 0.001
EMX2OS	PREPL	0.609	< 0.001
EMX2OS	RSF1	0.421	< 0.001
EMX2OS	CAB39L	0.448	< 0.001
EMX2OS	SLC5A8	0.594	< 0.001
EMX2OS	GABRB3	0.516	< 0.001
EMX2OS	PAFAH2	0.479	< 0.001
EMX2OS	HMBOX1	0.447	< 0.001
EMX2OS	ZNF585B	0.459	< 0.001
EMX2OS	ABLIM1	0.549	< 0.001
EMX2OS	EIF4EBP2	0.575	< 0.001
EMX2OS	ACADM	0.546	< 0.001
EMX2OS	AC073149.1	0.431	< 0.001
EMX2OS	CCDC84-DT	0.561	< 0.001
EMX2OS	DENND11	0.518	< 0.001
EMX2OS	RNF121	0.493	< 0.001
EMX2OS	DHX9	0.474	< 0.001
EMX2OS	CLDN2	0.432	< 0.001
EMX2OS	PPARGC1A	0.48	< 0.001
EMX2OS	PLEKHF2	0.427	< 0.001
EMX2OS	PLEKHA6	0.508	< 0.001
EMX2OS	PCM1	0.467	< 0.001
EMX2OS	C17orf113	0.619	< 0.001
EMX2OS	ZNF770	0.432	< 0.001
EMX2OS	ZNF780B	0.423	< 0.001
EMX2OS	PGAP4	0.576	< 0.001
EMX2OS	CRYL1	0.492	< 0.001
EMX2OS	DNAJC1	0.436	< 0.001
EMX2OS	FZD5	0.484	< 0.001
EMX2OS	AL513477.1	0.452	< 0.001
EMX2OS	KLLN	0.431	< 0.001
EMX2OS	ERICH5	0.463	< 0.001
EMX2OS	AF111167.2	0.45	< 0.001
EMX2OS	UFSP2	0.583	< 0.001
EMX2OS	FAM110C	0.509	< 0.001
EMX2OS	MAML2	0.535	< 0.001
EMX2OS	TIRAP	0.505	< 0.001
EMX2OS	PNRC2	0.474	< 0.001
EMX2OS	ARHGAP5	0.495	< 0.001
EMX2OS	ENPP5	0.538	< 0.001
EMX2OS	LINC01135	0.517	< 0.001
EMX2OS	ARHGEF7	0.413	< 0.001
EMX2OS	DMRTA1	0.578	< 0.001
EMX2OS	UGDH-AS1	0.546	< 0.001
EMX2OS	ALDH1L1-AS2	0.567	< 0.001
EMX2OS	ADCY5	0.656	< 0.001
EMX2OS	ALKBH1	0.419	< 0.001
EMX2OS	LRRC49	0.426	< 0.001
EMX2OS	PDK2	0.666	< 0.001
EMX2OS	PLPP3	0.578	< 0.001
EMX2OS	RFC1	0.446	< 0.001
EMX2OS	TNIK	0.428	< 0.001
EMX2OS	SPOPL	0.428	< 0.001
EMX2OS	ZNF543	0.44	< 0.001
EMX2OS	AC245519.1	0.433	< 0.001
EMX2OS	TMEM170A	0.527	< 0.001
EMX2OS	EMX2	0.809	< 0.001
EMX2OS	AP001625.2	0.511	< 0.001
EMX2OS	MYO18A	0.42	< 0.001
EMX2OS	KMT5B	0.532	< 0.001
EMX2OS	CRYZL2P	0.55	< 0.001
EMX2OS	BX284668.2	0.413	< 0.001
EMX2OS	HNRNPK	0.451	< 0.001
EMX2OS	SOX13	0.547	< 0.001
EMX2OS	PIK3C2B	0.404	< 0.001
EMX2OS	C17orf80	0.517	< 0.001
EMX2OS	TTC8	0.402	< 0.001
EMX2OS	C1orf210	0.645	< 0.001
EMX2OS	LHFPL3-AS2	0.605	< 0.001
EMX2OS	AC046185.2	0.49	< 0.001
EMX2OS	TXLNG	0.448	< 0.001
EMX2OS	IRF6	0.466	< 0.001
EMX2OS	ZBTB20	0.41	< 0.001
EMX2OS	UBR7	0.464	< 0.001
EMX2OS	SNRPCP3	0.508	< 0.001
EMX2OS	LONRF3	0.458	< 0.001
EMX2OS	CCSER1	0.502	< 0.001
EMX2OS	INVS	0.522	< 0.001
EMX2OS	AC129507.3	0.563	< 0.001
EMX2OS	SPTLC2	0.406	< 0.001
EMX2OS	RCAN2	0.442	< 0.001
EMX2OS	AKR7A2	0.453	< 0.001
EMX2OS	AL133383.3	0.423	< 0.001
EMX2OS	KIAA0319L	0.448	< 0.001
EMX2OS	MED29	0.468	< 0.001
EMX2OS	NIPAL3	0.431	< 0.001
EMX2OS	ZXDB	0.406	< 0.001
EMX2OS	EDNRB	0.506	< 0.001
EMX2OS	ZFP30	0.501	< 0.001
EMX2OS	DISP1	0.419	< 0.001
EMX2OS	ZMYND12	0.442	< 0.001
EMX2OS	TSC1	0.506	< 0.001
EMX2OS	FBXO15	0.428	< 0.001
EMX2OS	HERC1	0.412	< 0.001
EMX2OS	ZNF181	0.479	< 0.001
EMX2OS	ADAMTS9-AS1	0.594	< 0.001
EMX2OS	LRRC40	0.424	< 0.001
EMX2OS	CDK19	0.424	< 0.001
EMX2OS	BICRAL	0.451	< 0.001
EMX2OS	KIF13B	0.477	< 0.001
EMX2OS	AL122035.1	0.457	< 0.001
EMX2OS	TOLLIP	0.54	< 0.001
EMX2OS	CLUHP3	0.504	< 0.001
EMX2OS	HHAT	0.482	< 0.001
EMX2OS	SNRNP200	0.494	< 0.001
EMX2OS	AKT3	0.445	< 0.001
EMX2OS	KIFC3	0.416	< 0.001
EMX2OS	SYN3	0.476	< 0.001
EMX2OS	SLC2A11	0.504	< 0.001
EMX2OS	TMEM200A	0.432	< 0.001
EMX2OS	IPO5P1	0.494	< 0.001
EMX2OS	CREBBP	0.487	< 0.001
EMX2OS	DDAH1	0.662	< 0.001
EMX2OS	LDHD	0.528	< 0.001
EMX2OS	AL928654.1	0.48	< 0.001
EMX2OS	GPATCH8	0.401	< 0.001
EMX2OS	ZNF527	0.447	< 0.001
EMX2OS	INPP5F	0.484	< 0.001
EMX2OS	NAT8	0.448	< 0.001
EMX2OS	RTCA-AS1	0.54	< 0.001
EMX2OS	ANKRD40	0.464	< 0.001
EMX2OS	AL132800.1	0.427	< 0.001
EMX2OS	C11orf71	0.454	< 0.001
EMX2OS	USP8	0.496	< 0.001
EMX2OS	PRORP	0.402	< 0.001
EMX2OS	BTBD9	0.514	< 0.001
EMX2OS	PKLR	0.409	< 0.001
EMX2OS	LINC00526	0.463	< 0.001
EMX2OS	CLEC18B	0.49	< 0.001
EMX2OS	ACTR10	0.471	< 0.001
EMX2OS	APPBP2	0.407	< 0.001
EMX2OS	ARID1B	0.428	< 0.001
EMX2OS	MUL1	0.426	< 0.001
EMX2OS	CUL3	0.49	< 0.001
EMX2OS	SLC47A1P1	0.522	< 0.001
EMX2OS	ANKS6	0.542	< 0.001
EMX2OS	CIART	0.43	< 0.001
EMX2OS	AC012313.5	0.508	< 0.001
EMX2OS	MGAM	0.55	< 0.001
EMX2OS	SPRED2	0.408	< 0.001
EMX2OS	SLC16A9	0.632	< 0.001
EMX2OS	AL031848.1	0.409	< 0.001
EMX2OS	VAMP2	0.558	< 0.001
EMX2OS	OSBPL1A	0.607	< 0.001
EMX2OS	NXNL2	0.448	< 0.001
EMX2OS	DCAF11	0.564	< 0.001
EMX2OS	PDSS2	0.425	< 0.001
EMX2OS	UVRAG	0.416	< 0.001
EMX2OS	SLC5A1	0.472	< 0.001
EMX2OS	THTPA	0.508	< 0.001
EMX2OS	TOM1L2	0.641	< 0.001
EMX2OS	FBXO9	0.514	< 0.001
EMX2OS	SUGT1P3	0.515	< 0.001
EMX2OS	CMBL	0.547	< 0.001
EMX2OS	JKAMP	0.432	< 0.001
EMX2OS	ZFP14	0.446	< 0.001
EMX2OS	AL139384.2	0.42	< 0.001
EMX2OS	IFT88	0.564	< 0.001
EMX2OS	SMAD4	0.527	< 0.001
EMX2OS	NCOA7	0.434	< 0.001
EMX2OS	SERINC1	0.542	< 0.001
EMX2OS	PIK3C2A	0.476	< 0.001
EMX2OS	AC124854.1	0.534	< 0.001
EMX2OS	NLRP6	0.432	< 0.001
EMX2OS	CDK20	0.556	< 0.001
EMX2OS	SUGT1	0.51	< 0.001
EMX2OS	SNX27	0.446	< 0.001
EMX2OS	SPATA6	0.539	< 0.001
EMX2OS	UPB1	0.49	< 0.001
EMX2OS	UBXN2B	0.441	< 0.001
EMX2OS	LINC00501	0.411	< 0.001
EMX2OS	CCND1	0.488	< 0.001
EMX2OS	C18orf25	0.425	< 0.001
EMX2OS	SLC16A12-AS1	0.455	< 0.001
EMX2OS	CPSF7	0.481	< 0.001
EMX2OS	CRYZL1	0.429	< 0.001
EMX2OS	BBS1	0.43	< 0.001
EMX2OS	UBR1	0.434	< 0.001
EMX2OS	MSRA	0.454	< 0.001
EMX2OS	MIR140	0.569	< 0.001
EMX2OS	AC090286.1	0.441	< 0.001
EMX2OS	ABRAXAS1	0.476	< 0.001
EMX2OS	TM7SF3	0.416	< 0.001
EMX2OS	STX3	0.551	< 0.001
EMX2OS	GAPVD1	0.417	< 0.001
EMX2OS	STK32B	0.572	< 0.001
EMX2OS	BCKDHA	0.406	< 0.001
EMX2OS	COBL	0.433	< 0.001
EMX2OS	NTN4	0.6	< 0.001
EMX2OS	SAMD15	0.571	< 0.001
EMX2OS	XYLB	0.492	< 0.001
EMX2OS	GPBP1L1	0.449	< 0.001
EMX2OS	AC019097.1	0.403	< 0.001
EMX2OS	PRKAB1	0.453	< 0.001
EMX2OS	DDX46	0.436	< 0.001
EMX2OS	RABGAP1	0.493	< 0.001
EMX2OS	PEX1	0.461	< 0.001
EMX2OS	DHRS4-AS1	0.414	< 0.001
EMX2OS	SYDE2	0.642	< 0.001
EMX2OS	AC137056.1	0.416	< 0.001
EMX2OS	PM20D2	0.478	< 0.001
EMX2OS	ZNF136	0.501	< 0.001
EMX2OS	REV1	0.485	< 0.001
EMX2OS	RNU6-720P	0.443	< 0.001
EMX2OS	FAHD1	0.483	< 0.001
EMX2OS	TBC1D8-AS1	0.41	< 0.001
EMX2OS	TMEM186	0.416	< 0.001
EMX2OS	AKAP6	0.519	< 0.001
EMX2OS	MYEF2	0.56	< 0.001
EMX2OS	SCGN	0.543	< 0.001
EMX2OS	HNRNPH3	0.495	< 0.001
EMX2OS	DUBR	0.411	< 0.001
EMX2OS	MCF2L	0.554	< 0.001
EMX2OS	SNIP1	0.405	< 0.001
EMX2OS	PDZK1	0.603	< 0.001
EMX2OS	CXorf56	0.441	< 0.001
EMX2OS	HERC3	0.45	< 0.001
EMX2OS	SMIM2-AS1	0.408	< 0.001
EMX2OS	TLN2	0.661	< 0.001
EMX2OS	AC018647.2	0.467	< 0.001
EMX2OS	IVD	0.526	< 0.001
EMX2OS	EBLN3P	0.42	< 0.001
EMX2OS	PPARG	0.41	< 0.001
EMX2OS	WWP2	0.525	< 0.001
EMX2OS	SOWAHB	0.648	< 0.001
EMX2OS	AL080250.1	0.456	< 0.001
EMX2OS	CNPPD1	0.484	< 0.001
EMX2OS	EZR	0.588	< 0.001
EMX2OS	PHAX	0.411	< 0.001
EMX2OS	RIOK3	0.447	< 0.001
EMX2OS	CLCN5	0.644	< 0.001
EMX2OS	FNIP2	0.507	< 0.001
EMX2OS	AC026462.3	0.459	< 0.001
EMX2OS	KCTD16	0.413	< 0.001
EMX2OS	ZNF711	0.547	< 0.001
EMX2OS	PIGCP1	0.544	< 0.001
EMX2OS	AC026992.2	0.621	< 0.001
EMX2OS	SRSF8	0.502	< 0.001
EMX2OS	AC008554.1	0.529	< 0.001
EMX2OS	CRYZL2P-SEC16B	0.425	< 0.001
EMX2OS	ATOH8	0.475	< 0.001
EMX2OS	C16orf86	0.43	< 0.001
EMX2OS	FRMPD2	0.508	< 0.001
EMX2OS	TLL1	0.456	< 0.001
EMX2OS	TRIP11	0.491	< 0.001
EMX2OS	VPS37D	0.407	< 0.001
EMX2OS	ZNF836	0.454	< 0.001
EMX2OS	CENPV	0.473	< 0.001
EMX2OS	PPP1R12A-AS1	0.49	< 0.001
EMX2OS	SMU1	0.43	< 0.001
EMX2OS	BCOR	0.409	< 0.001
EMX2OS	TEX10	0.439	< 0.001
EMX2OS	AC093627.5	0.409	< 0.001
EMX2OS	AFG3L2	0.515	< 0.001
EMX2OS	NEDD9	0.428	< 0.001
EMX2OS	ABCD3	0.454	< 0.001
EMX2OS	GBA2	0.457	< 0.001
EMX2OS	LINC01780	0.424	< 0.001
EMX2OS	KBTBD4	0.452	< 0.001
EMX2OS	GSTA4	0.447	< 0.001
EMX2OS	DDX42	0.402	< 0.001
EMX2OS	B4GAT1	0.473	< 0.001
EMX2OS	ZYG11B	0.435	< 0.001
EMX2OS	SOWAHC	0.587	< 0.001
EMX2OS	SCAPER	0.606	< 0.001
EMX2OS	AC007406.2	0.458	< 0.001
EMX2OS	TTC21B	0.461	< 0.001
EMX2OS	PDPK1	0.515	< 0.001
EMX2OS	CAVIN2	0.548	< 0.001
EMX2OS	OTUD7B	0.47	< 0.001
EMX2OS	PTAR1	0.523	< 0.001
EMX2OS	ARHGEF12	0.482	< 0.001
EMX2OS	PPM1D	0.421	< 0.001
EMX2OS	ENPP7P8	0.495	< 0.001
EMX2OS	YLPM1	0.455	< 0.001
EMX2OS	TRHDE	0.601	< 0.001
EMX2OS	ADH5	0.533	< 0.001
EMX2OS	ACSL1	0.49	< 0.001
EMX2OS	KLHL36	0.421	< 0.001
EMX2OS	MTCH1	0.485	< 0.001
EMX2OS	AC027601.3	0.439	< 0.001
EMX2OS	AC114291.1	0.445	< 0.001
EMX2OS	ZNF112	0.565	< 0.001
EMX2OS	LINC01060	0.44	< 0.001
EMX2OS	CDC14B	0.675	< 0.001
EMX2OS	PHACTR4	0.44	< 0.001
EMX2OS	AP001160.3	0.46	< 0.001
EMX2OS	AL731577.2	0.441	< 0.001
EMX2OS	MBTD1	0.481	< 0.001
EMX2OS	KCNK5	0.536	< 0.001
EMX2OS	PTH1R	0.52	< 0.001
EMX2OS	AC097639.1	0.404	< 0.001
EMX2OS	AL592114.3	0.536	< 0.001
EMX2OS	AJUBA	0.477	< 0.001
EMX2OS	FGFR3	0.452	< 0.001
EMX2OS	LINGO4	0.503	< 0.001
EMX2OS	AC103746.1	0.443	< 0.001
EMX2OS	TMEM106A	0.416	< 0.001
EMX2OS	PTH2R	0.501	< 0.001
EMX2OS	AP000640.1	0.49	< 0.001
EMX2OS	TRIM39	0.423	< 0.001
EMX2OS	CUL5	0.471	< 0.001
EMX2OS	ZFAT	0.425	< 0.001
EMX2OS	DNAL1	0.574	< 0.001
EMX2OS	ENOSF1	0.446	< 0.001
EMX2OS	LINC00663	0.493	< 0.001
EMX2OS	PITPNC1	0.497	< 0.001
EMX2OS	AP2B1	0.423	< 0.001
EMX2OS	KIAA0355	0.421	< 0.001
EMX2OS	PEX11A	0.582	< 0.001
EMX2OS	CDC42BPG	0.476	< 0.001
EMX2OS	AC007743.1	0.427	< 0.001
EMX2OS	MTFR1L	0.422	< 0.001
EMX2OS	CCNG2	0.408	< 0.001
EMX2OS	AC112220.2	0.461	< 0.001
EMX2OS	DET1	0.437	< 0.001
EMX2OS	LLGL2	0.476	< 0.001
EMX2OS	RHPN2	0.523	< 0.001
EMX2OS	CCP110	0.409	< 0.001
EMX2OS	DHX38	0.426	< 0.001
EMX2OS	PLS1	0.515	< 0.001
EMX2OS	FRA10AC1	0.451	< 0.001
EMX2OS	GPLD1	0.409	< 0.001
EMX2OS	CCDC28A	0.41	< 0.001
EMX2OS	MASP1	0.462	< 0.001
EMX2OS	PMM1	0.511	< 0.001
EMX2OS	TERF2	0.426	< 0.001
EMX2OS	ACAD11	0.519	< 0.001
EMX2OS	COL4A4	0.585	< 0.001
EMX2OS	DNAJC27	0.589	< 0.001
EMX2OS	AL033381.2	0.402	< 0.001
EMX2OS	ZNF134	0.428	< 0.001
EMX2OS	ATP13A4	0.469	< 0.001
EMX2OS	CTC1	0.472	< 0.001
EMX2OS	VTI1B	0.413	< 0.001
EMX2OS	SRP54	0.461	< 0.001
EMX2OS	LRRC8A	0.504	< 0.001
EMX2OS	FRAS1	0.496	< 0.001
EMX2OS	AASS	0.421	< 0.001
EMX2OS	CPEB3	0.476	< 0.001
EMX2OS	HEXIM1	0.422	< 0.001
EMX2OS	RORA	0.522	< 0.001
EMX2OS	RALGAPA1	0.562	< 0.001
EMX2OS	MED17	0.497	< 0.001
EMX2OS	WDSUB1	0.487	< 0.001
EMX2OS	PCK2	0.403	< 0.001
EMX2OS	MAT2A	0.535	< 0.001
EMX2OS	TOB2	0.537	< 0.001
EMX2OS	CLCN6	0.603	< 0.001
EMX2OS	EXPH5	0.447	< 0.001
EMX2OS	VAPB	0.416	< 0.001
EMX2OS	JAK1	0.43	< 0.001
EMX2OS	SLC25A23	0.551	< 0.001
EMX2OS	ZNF420	0.423	< 0.001
EMX2OS	AC114316.1	0.452	< 0.001
EMX2OS	AC121338.2	0.545	< 0.001
EMX2OS	TMEM135	0.458	< 0.001
EMX2OS	C4orf3	0.413	< 0.001
EMX2OS	SMARCA2	0.401	< 0.001
EMX2OS	TNIP1	0.417	< 0.001
EMX2OS	AC019193.2	0.431	< 0.001
EMX2OS	BBS7	0.557	< 0.001
EMX2OS	CWF19L2	0.486	< 0.001
EMX2OS	COG8	0.458	< 0.001
EMX2OS	PRUNE2	0.494	< 0.001
EMX2OS	SCGB1D2	0.475	< 0.001
EMX2OS	ACVR2A	0.486	< 0.001
EMX2OS	KLF6	0.444	< 0.001
EMX2OS	HIBCH	0.623	< 0.001
EMX2OS	RAPGEF2	0.556	< 0.001
EMX2OS	DYRK3	0.452	< 0.001
EMX2OS	RORC	0.623	< 0.001
EMX2OS	RPL7L1	0.404	< 0.001
EMX2OS	TUFT1	0.487	< 0.001
EMX2OS	AL357140.2	0.447	< 0.001
EMX2OS	BSDC1	0.493	< 0.001
EMX2OS	SF3A1	0.493	< 0.001
EMX2OS	STAM2	0.44	< 0.001
EMX2OS	PIK3R4	0.404	< 0.001
EMX2OS	ZNF772	0.448	< 0.001
EMX2OS	TMIGD1	0.407	< 0.001
EMX2OS	SERP2	0.413	< 0.001
EMX2OS	RPRD1A	0.428	< 0.001
EMX2OS	STEAP2	0.432	< 0.001
EMX2OS	LINC01843	0.438	< 0.001
EMX2OS	MRPL49	0.485	< 0.001
EMX2OS	MORN4	0.442	< 0.001
EMX2OS	STX7	0.45	< 0.001
EMX2OS	NRG1	0.448	< 0.001
EMX2OS	CYP1D1P	0.577	< 0.001
EMX2OS	ACO2	0.467	< 0.001
EMX2OS	FBXL20	0.437	< 0.001
EMX2OS	KRBA2	0.502	< 0.001
EMX2OS	EPB41L1	0.505	< 0.001
EMX2OS	ARHGAP35	0.447	< 0.001
EMX2OS	SLCO2A1	0.404	< 0.001
EMX2OS	ALPL	0.428	< 0.001
EMX2OS	SLC6A13	0.449	< 0.001
EMX2OS	PRPF4B	0.413	< 0.001
EMX2OS	SETD3	0.618	< 0.001
EMX2OS	LINC02175	0.414	< 0.001
EMX2OS	ZNF776	0.534	< 0.001
EMX2OS	SLC26A9	0.418	< 0.001
EMX2OS	AGL	0.407	< 0.001
EMX2OS	PPFIBP1	0.529	< 0.001
EMX2OS	UBR2	0.462	< 0.001
EMX2OS	CDC40	0.477	< 0.001
EMX2OS	CDC42BPB	0.497	< 0.001
EMX2OS	C19orf71	0.431	< 0.001
EMX2OS	LHFPL3-AS1	0.438	< 0.001
EMX2OS	ILK	0.422	< 0.001
EMX2OS	COX15	0.537	< 0.001
EMX2OS	MTSS1	0.553	< 0.001
EMX2OS	TMEM246-AS1	0.472	< 0.001
EMX2OS	TEX9	0.483	< 0.001
EMX2OS	KIAA0232	0.462	< 0.001
EMX2OS	ZNF91	0.463	< 0.001
EMX2OS	RERE	0.501	< 0.001
EMX2OS	EPG5	0.428	< 0.001
EMX2OS	MYO9A	0.655	< 0.001
EMX2OS	OGA	0.492	< 0.001
EMX2OS	VPS11	0.53	< 0.001
EMX2OS	KSR1	0.474	< 0.001
EMX2OS	PRRC2B	0.497	< 0.001
EMX2OS	SLTM	0.419	< 0.001
EMX2OS	GNB5	0.447	< 0.001
EMX2OS	AC104938.1	0.431	< 0.001
EMX2OS	FAM160A1-DT	0.456	< 0.001
EMX2OS	ABRAXAS2	0.484	< 0.001
EMX2OS	NKAPD1	0.442	< 0.001
EMX2OS	EIF5	0.403	< 0.001
EMX2OS	RCBTB2	0.625	< 0.001
EMX2OS	MTM1	0.435	< 0.001
EMX2OS	CLCN4	0.409	< 0.001
EMX2OS	KDR	0.449	< 0.001
EMX2OS	CTNND1	0.53	< 0.001
EMX2OS	ABHD6	0.501	< 0.001
EMX2OS	ZNF554	0.443	< 0.001
EMX2OS	RDX	0.483	< 0.001
EMX2OS	FLRT3	0.409	< 0.001
EMX2OS	AC025263.1	0.501	< 0.001
EMX2OS	CFAP58	0.416	< 0.001
EMX2OS	GLYATL1	0.534	< 0.001
EMX2OS	ETFDH	0.574	< 0.001
EMX2OS	AC226118.1	0.548	< 0.001
EMX2OS	SCAF8	0.424	< 0.001
EMX2OS	RGCC	0.412	< 0.001
EMX2OS	RN7SL8P	0.526	< 0.001
EMX2OS	RSBN1	0.467	< 0.001
EMX2OS	LRBA	0.482	< 0.001
EMX2OS	SUPT6H	0.507	< 0.001
EMX2OS	AL135927.1	0.421	< 0.001
EMX2OS	HBP1	0.414	< 0.001
EMX2OS	CNNM3-DT	0.495	< 0.001
EMX2OS	CCDC25	0.474	< 0.001
EMX2OS	AC018752.1	0.439	< 0.001
EMX2OS	AL121574.1	0.45	< 0.001
EMX2OS	PEG10	0.494	< 0.001
EMX2OS	KIF13A	0.451	< 0.001
EMX2OS	TRPM7	0.408	< 0.001
EMX2OS	REN	0.436	< 0.001
EMX2OS	ABO	0.456	< 0.001
EMX2OS	TMEM38A	0.426	< 0.001
EMX2OS	ZNF429	0.413	< 0.001
EMX2OS	TMEM72	0.547	< 0.001
EMX2OS	PCYOX1	0.465	< 0.001
EMX2OS	ZNF175	0.43	< 0.001
EMX2OS	CDKN2AIP	0.401	< 0.001
EMX2OS	GRIK3	0.434	< 0.001
EMX2OS	AC018730.1	0.57	< 0.001
EMX2OS	WWC2	0.482	< 0.001
EMX2OS	ARMH3	0.453	< 0.001
EMX2OS	MFAP1	0.509	< 0.001
EMX2OS	ZNF687	0.449	< 0.001
EMX2OS	JADE2	0.433	< 0.001
EMX2OS	LRRC37A7P	0.487	< 0.001
EMX2OS	AC004943.2	0.497	< 0.001
EMX2OS	CNKSR3	0.484	< 0.001
EMX2OS	COL4A3	0.517	< 0.001
EMX2OS	TOX4	0.487	< 0.001
EMX2OS	KLHDC2	0.574	< 0.001
EMX2OS	KIAA1549	0.635	< 0.001
EMX2OS	HSD3BP5	0.445	< 0.001
EMX2OS	SYNE1	0.46	< 0.001
EMX2OS	PDGFD	0.524	< 0.001
EMX2OS	WDR33	0.545	< 0.001
EMX2OS	RIPK4	0.444	< 0.001
EMX2OS	MAPK8	0.608	< 0.001
EMX2OS	HIC2	0.461	< 0.001
EMX2OS	PPM1A	0.526	< 0.001
EMX2OS	LINC01507	0.662	< 0.001
EMX2OS	MIGA1	0.512	< 0.001
EMX2OS	ASH2L	0.405	< 0.001
EMX2OS	AC025580.3	0.42	< 0.001
EMX2OS	AP002840.2	0.457	< 0.001
EMX2OS	DLG3	0.402	< 0.001
EMX2OS	PAX2	0.524	< 0.001
EMX2OS	ZNF839	0.435	< 0.001
EMX2OS	LIFR-AS1	0.583	< 0.001
EMX2OS	BTBD7	0.548	< 0.001
EMX2OS	FRMD3	0.611	< 0.001
EMX2OS	EMCN	0.464	< 0.001
EMX2OS	PAH	0.412	< 0.001
EMX2OS	HEATR5B	0.504	< 0.001
EMX2OS	BAIAP3	0.43	< 0.001
EMX2OS	ZNF791	0.42	< 0.001
EMX2OS	LZIC	0.488	< 0.001
EMX2OS	CAMSAP1	0.514	< 0.001
EMX2OS	HDAC5	0.448	< 0.001
EMX2OS	AC012618.3	0.498	< 0.001
EMX2OS	NUP160	0.493	< 0.001
EMX2OS	IMPA2	0.642	< 0.001
EMX2OS	PLPBP	0.489	< 0.001
EMX2OS	AS3MT	0.444	< 0.001
EMX2OS	MICU2	0.42	< 0.001
EMX2OS	NDUFA10	0.412	< 0.001
EMX2OS	OTUD3	0.437	< 0.001
EMX2OS	POU3F3	0.552	< 0.001
EMX2OS	TSPYL4	0.469	< 0.001
EMX2OS	AP4S1	0.459	< 0.001
EMX2OS	TYW3	0.45	< 0.001
EMX2OS	LGALSL	0.465	< 0.001
EMX2OS	RPL34-AS1	0.474	< 0.001
EMX2OS	CENPS-CORT	0.413	< 0.001
EMX2OS	PCNX1	0.433	< 0.001
EMX2OS	SCAI	0.411	< 0.001
EMX2OS	CCDC148	0.408	< 0.001
EMX2OS	AGPAT3	0.442	< 0.001
EMX2OS	ZBTB44	0.461	< 0.001
EMX2OS	CENPC	0.44	< 0.001
EMX2OS	ZNF235	0.405	< 0.001
EMX2OS	KANK3	0.492	< 0.001
EMX2OS	SOX6	0.517	< 0.001
EMX2OS	NHEJ1	0.493	< 0.001
EMX2OS	PLCL1	0.408	< 0.001
EMX2OS	TCL6	0.471	< 0.001
EMX2OS	SATB2	0.53	< 0.001
EMX2OS	ARHGEF9	0.474	< 0.001
EMX2OS	BNIP3	0.435	< 0.001
EMX2OS	EPS15L1	0.43	< 0.001
EMX2OS	LINC02625	0.497	< 0.001
EMX2OS	PODXL	0.42	< 0.001
EMX2OS	ZNF671	0.417	< 0.001
EMX2OS	PRKCE	0.437	< 0.001
EMX2OS	RN7SL268P	0.411	< 0.001
EMX2OS	DDHD2	0.508	< 0.001
EMX2OS	SLC1A1	0.518	< 0.001
EMX2OS	GLE1	0.412	< 0.001
EMX2OS	TMEM171	0.516	< 0.001
EMX2OS	AP000445.1	0.527	< 0.001
EMX2OS	MLH3	0.405	< 0.001
EMX2OS	TCF20	0.432	< 0.001
EMX2OS	SHMT1	0.567	< 0.001
EMX2OS	SH3BGRL2	0.449	< 0.001
EMX2OS	ZNF462	0.578	< 0.001
EMX2OS	MTO1	0.524	< 0.001
EMX2OS	MAPK1	0.481	< 0.001
EMX2OS	AP003392.6	0.429	< 0.001
EMX2OS	PCF11	0.421	< 0.001
EMX2OS	HMGCS1	0.438	< 0.001
EMX2OS	TRMT1L	0.521	< 0.001
EMX2OS	ZNF658	0.532	< 0.001
EMX2OS	GGT8P	0.438	< 0.001
EMX2OS	XPC	0.51	< 0.001
EMX2OS	CHM	0.405	< 0.001
EMX2OS	RNF43	0.453	< 0.001
EMX2OS	SH3YL1	0.484	< 0.001
EMX2OS	NAT8B	0.528	< 0.001
EMX2OS	WDR11	0.509	< 0.001
EMX2OS	ZNF223	0.402	< 0.001
EMX2OS	BHMT	0.505	< 0.001
EMX2OS	UGT2A3	0.422	< 0.001
EMX2OS	PHC1P1	0.473	< 0.001
EMX2OS	ZNF638	0.444	< 0.001
EMX2OS	MARC1	0.482	< 0.001
EMX2OS	ASH1L	0.473	< 0.001
EMX2OS	TMEM25	0.435	< 0.001
EMX2OS	MOAP1	0.632	< 0.001
EMX2OS	LRRC37A17P	0.492	< 0.001
EMX2OS	DHX40	0.41	< 0.001
EMX2OS	PLEKHG3	0.441	< 0.001
EMX2OS	SLC3A1	0.614	< 0.001
EMX2OS	MACO1	0.534	< 0.001
EMX2OS	ACSM5P1	0.421	< 0.001
EMX2OS	CASKIN2	0.446	< 0.001
EMX2OS	TIMM21	0.453	< 0.001
EMX2OS	DUSP3	0.424	< 0.001
EMX2OS	EXOC6B	0.545	< 0.001
EMX2OS	SLC12A4	0.495	< 0.001
EMX2OS	METTL14	0.574	< 0.001
EMX2OS	STAT5B	0.541	< 0.001
EMX2OS	GLG1	0.418	< 0.001
EMX2OS	UTP4	0.432	< 0.001
EMX2OS	SLC10A2	0.531	< 0.001
EMX2OS	PKP4	0.598	< 0.001
EMX2OS	USP27X-AS1	0.483	< 0.001
EMX2OS	KAT7	0.51	< 0.001
EMX2OS	ACMSD	0.455	< 0.001
EMX2OS	ZSCAN31	0.414	< 0.001
EMX2OS	DNAJC16	0.668	< 0.001
EMX2OS	SCAND2P	0.424	< 0.001
EMX2OS	TNFRSF19	0.527	< 0.001
EMX2OS	LRRC37BP1	0.456	< 0.001
EMX2OS	TTC7B	0.414	< 0.001
EMX2OS	CCDC85C	0.48	< 0.001
EMX2OS	OSBPL9	0.463	< 0.001
EMX2OS	CBWD2	0.482	< 0.001
EMX2OS	MAST4	0.553	< 0.001
EMX2OS	TOM1L1	0.609	< 0.001
EMX2OS	DAB2	0.438	< 0.001
EMX2OS	TTC19	0.541	< 0.001
EMX2OS	FGF7P3	0.407	< 0.001
EMX2OS	CTBP2	0.568	< 0.001
EMX2OS	AC009163.7	0.476	< 0.001
EMX2OS	BRAF	0.479	< 0.001
EMX2OS	ESPNP	0.54	< 0.001
EMX2OS	MTERF4	0.534	< 0.001
EMX2OS	ENPP4	0.558	< 0.001
EMX2OS	ZNF221	0.422	< 0.001
EMX2OS	GIN1	0.524	< 0.001
EMX2OS	VPS4B	0.494	< 0.001
EMX2OS	AC007637.1	0.441	< 0.001
EMX2OS	AGAP1	0.493	< 0.001
EMX2OS	TUBD1	0.449	< 0.001
EMX2OS	FAT4	0.519	< 0.001
EMX2OS	WWC1	0.448	< 0.001
EMX2OS	WDR17	0.496	< 0.001
EMX2OS	ACBD4	0.457	< 0.001
EMX2OS	EHHADH	0.56	< 0.001
EMX2OS	RNF146	0.479	< 0.001
EMX2OS	LMO7	0.481	< 0.001
EMX2OS	SHPRH	0.487	< 0.001
EMX2OS	KIF21A	0.413	< 0.001
EMX2OS	EYA3	0.534	< 0.001
EMX2OS	TACC2	0.465	< 0.001
EMX2OS	ZNF570	0.477	< 0.001
EMX2OS	NCKIPSD	0.448	< 0.001
EMX2OS	HABP4	0.536	< 0.001
EMX2OS	KANSL1L	0.534	< 0.001
EMX2OS	WDR20	0.53	< 0.001
EMX2OS	IRF2BP2	0.459	< 0.001
EMX2OS	PDE9A	0.42	< 0.001
EMX2OS	ZFP37	0.442	< 0.001
EMX2OS	FOXO4	0.547	< 0.001
EMX2OS	PURA	0.534	< 0.001
EMX2OS	AC004485.1	0.436	< 0.001
EMX2OS	AGMAT	0.573	< 0.001
EMX2OS	TUBGCP4	0.481	< 0.001
EMX2OS	TRAM2-AS1	0.427	< 0.001
EMX2OS	SUGCT	0.499	< 0.001
EMX2OS	WDR47	0.412	< 0.001
EMX2OS	SAMD5	0.544	< 0.001
EMX2OS	NEBL-AS1	0.446	< 0.001
EMX2OS	MLNR	0.439	< 0.001
EMX2OS	WDR31	0.715	< 0.001
EMX2OS	SLC17A1	0.485	< 0.001
EMX2OS	DENND1C	0.58	< 0.001
EMX2OS	AFMID	0.434	< 0.001
EMX2OS	CLTRN	0.545	< 0.001
EMX2OS	ZNF189	0.589	< 0.001
EMX2OS	ANKRD12	0.486	< 0.001
EMX2OS	TIMP3	0.486	< 0.001
EMX2OS	ZXDC	0.441	< 0.001
EMX2OS	MYOM3	0.425	< 0.001
EMX2OS	WAC	0.586	< 0.001
EMX2OS	CDH16	0.438	< 0.001
EMX2OS	AC003984.1	0.45	< 0.001
EMX2OS	AC124242.1	0.523	< 0.001
EMX2OS	RNF20	0.511	< 0.001
EMX2OS	RREB1	0.44	< 0.001
EMX2OS	CDKL2	0.617	< 0.001
EMX2OS	RAVER2	0.627	< 0.001
EMX2OS	ZMYND11	0.51	< 0.001
EMX2OS	DPP4	0.524	< 0.001
EMX2OS	SIRT5	0.417	< 0.001
EMX2OS	PKMP3	0.48	< 0.001
EMX2OS	PRMT9	0.47	< 0.001
EMX2OS	ZNF204P	0.49	< 0.001
EMX2OS	LINC00909	0.489	< 0.001
EMX2OS	LINC01600	0.471	< 0.001
EMX2OS	CHMP1B	0.403	< 0.001
EMX2OS	WDR35	0.49	< 0.001
EMX2OS	TUB	0.551	< 0.001
EMX2OS	FNBP1L	0.605	< 0.001
EMX2OS	NKIRAS1	0.438	< 0.001
EMX2OS	PRR26	0.41	< 0.001
EMX2OS	SAP30L	0.546	< 0.001
EMX2OS	AL161782.1	0.628	< 0.001
EMX2OS	ELMSAN1	0.43	< 0.001
EMX2OS	ATP11A	0.623	< 0.001
EMX2OS	AC009060.1	0.514	< 0.001
EMX2OS	FAM107A	0.486	< 0.001
EMX2OS	DENND4C	0.477	< 0.001
EMX2OS	UFL1	0.423	< 0.001
EMX2OS	TINAG	0.499	< 0.001
EMX2OS	MAOB	0.413	< 0.001
EMX2OS	GAS8	0.482	< 0.001
EMX2OS	SPTBN1	0.527	< 0.001
EMX2OS	SLC25A21-AS1	0.449	< 0.001
EMX2OS	RNU6-44P	0.46	< 0.001
EMX2OS	FUT6	0.504	< 0.001
EMX2OS	ENPEP	0.486	< 0.001
EMX2OS	BCL2	0.612	< 0.001
EMX2OS	RAB21	0.533	< 0.001
EMX2OS	BEX5	0.448	< 0.001
EMX2OS	SLC17A4	0.442	< 0.001
EMX2OS	MEGF9	0.562	< 0.001
EMX2OS	ACVR2B-AS1	0.471	< 0.001
EMX2OS	KCNJ16	0.48	< 0.001
EMX2OS	KLF7	0.434	< 0.001
EMX2OS	SNORA59B	0.401	< 0.001
EMX2OS	SLC22A6	0.512	< 0.001
EMX2OS	TRIP4	0.637	< 0.001
EMX2OS	SASH1	0.435	< 0.001
EMX2OS	ETNK2	0.425	< 0.001
EMX2OS	SLC26A1	0.403	< 0.001
EMX2OS	TMEM220	0.513	< 0.001
EMX2OS	PLCL2	0.435	< 0.001
EMX2OS	INPP5A	0.428	< 0.001
EMX2OS	LDB2	0.407	< 0.001
EMX2OS	LINC01132	0.542	< 0.001
EMX2OS	TMEM192	0.532	< 0.001
EMX2OS	PRKCZ	0.569	< 0.001
EMX2OS	OSBP	0.466	< 0.001
EMX2OS	DMGDH	0.521	< 0.001
EMX2OS	GNG12-AS1	0.445	< 0.001
EMX2OS	GOT1	0.487	< 0.001
EMX2OS	MB21D2	0.433	< 0.001
EMX2OS	YME1L1	0.412	< 0.001
EMX2OS	AL353801.1	0.562	< 0.001
EMX2OS	AC104964.3	0.46	< 0.001
EMX2OS	KLF12	0.44	< 0.001
EMX2OS	CEP104	0.557	< 0.001
EMX2OS	AP002495.1	0.454	< 0.001
EMX2OS	RPRD2	0.509	< 0.001
EMX2OS	ZNF555	0.427	< 0.001
EMX2OS	PPP1R21	0.559	< 0.001
EMX2OS	CNTLN	0.464	< 0.001
EMX2OS	ASPG	0.418	< 0.001
EMX2OS	SLC17A3	0.439	< 0.001
EMX2OS	RAG1	0.565	< 0.001
EMX2OS	RIMKLA	0.441	< 0.001
EMX2OS	RANBP10	0.404	< 0.001
EMX2OS	TMEM38B	0.565	< 0.001
EMX2OS	BCAS3	0.408	< 0.001
EMX2OS	SIPA1L1	0.587	< 0.001
EMX2OS	AK9	0.492	< 0.001
EMX2OS	VPS36	0.488	< 0.001
EMX2OS	ZNF14	0.478	< 0.001
EMX2OS	KLC4	0.468	< 0.001
EMX2OS	TSPAN18	0.465	< 0.001
EMX2OS	ACBD5	0.462	< 0.001
EMX2OS	RAI2	0.468	< 0.001
EMX2OS	ALG11	0.411	< 0.001
EMX2OS	PXMP2	0.402	< 0.001
EMX2OS	DNAH7	0.464	< 0.001
EMX2OS	HMGCL	0.409	< 0.001
EMX2OS	FLT1	0.427	< 0.001
EMX2OS	SPAG16	0.536	< 0.001
EMX2OS	LCMT2	0.422	< 0.001
EMX2OS	SOCS7	0.547	< 0.001
EMX2OS	LYRM7	0.458	< 0.001
EMX2OS	ACADSB	0.664	< 0.001
EMX2OS	BBOF1	0.477	< 0.001
EMX2OS	KIAA1217	0.471	< 0.001
EMX2OS	PHOSPHO2	0.557	< 0.001
EMX2OS	ZC3H13	0.434	< 0.001
EMX2OS	SLK	0.594	< 0.001
EMX2OS	AC009084.1	0.468	< 0.001
EMX2OS	C1orf115	0.588	< 0.001
EMX2OS	DMAC2L	0.555	< 0.001
EMX2OS	ALDH5A1	0.519	< 0.001
EMX2OS	SCFD1	0.429	< 0.001
EMX2OS	FECH	0.503	< 0.001
EMX2OS	SOS2	0.479	< 0.001
EMX2OS	FAM76A	0.436	< 0.001
EMX2OS	WDR45B	0.403	< 0.001
EMX2OS	EZH1	0.585	< 0.001
EMX2OS	LINC00271	0.48	< 0.001
EMX2OS	RAP2CP1	0.455	< 0.001
EMX2OS	GPHN	0.491	< 0.001
EMX2OS	MPP5	0.552	< 0.001
EMX2OS	ZBTB26	0.43	< 0.001
EMX2OS	TMCC3	0.512	< 0.001
EMX2OS	TSHZ1	0.573	< 0.001
EMX2OS	SNRNP48	0.484	< 0.001
EMX2OS	YPEL1	0.413	< 0.001
EMX2OS	AC010503.5	0.407	< 0.001
EMX2OS	VWA8	0.558	< 0.001
EMX2OS	SLC22A13	0.474	< 0.001
EMX2OS	AK7	0.523	< 0.001
EMX2OS	ELP4	0.489	< 0.001
EMX2OS	LINC01534	0.435	< 0.001
EMX2OS	AL353803.1	0.495	< 0.001
EMX2OS	FAM53B	0.401	< 0.001
EMX2OS	PTPN21	0.429	< 0.001
EMX2OS	LANCL1	0.414	< 0.001
EMX2OS	C6orf223	0.409	< 0.001
EMX2OS	RASEF	0.479	< 0.001
EMX2OS	MED22	0.529	< 0.001
EMX2OS	AFDN	0.486	< 0.001
EMX2OS	IFIT1	0.537	< 0.001
EMX2OS	AC129929.1	0.412	< 0.001
EMX2OS	AP1G1	0.497	< 0.001
EMX2OS	PDK4	0.402	< 0.001
EMX2OS	AKAP1	0.469	< 0.001
EMX2OS	SGSM1	0.652	< 0.001
EMX2OS	AC008555.1	0.46	< 0.001
EMX2OS	NUP214	0.522	< 0.001
EMX2OS	SUCLA2	0.586	< 0.001
EMX2OS	ARFGAP2	0.521	< 0.001
EMX2OS	AGPS	0.436	< 0.001
EMX2OS	TMEM150C	0.546	< 0.001
EMX2OS	COBLL1	0.413	< 0.001
EMX2OS	USP33	0.433	< 0.001
EMX2OS	AC060780.1	0.41	< 0.001
EMX2OS	ZNF573	0.445	< 0.001
EMX2OS	NUMB	0.669	< 0.001
EMX2OS	ORC4	0.51	< 0.001
EMX2OS	TUBGCP3	0.436	< 0.001
EMX2OS	INO80	0.49	< 0.001
EMX2OS	DDC	0.507	< 0.001
EMX2OS	PANK1	0.608	< 0.001
EMX2OS	ARHGAP8	0.43	< 0.001
EMX2OS	FBXW4	0.442	< 0.001
EMX2OS	CYFIP2	0.487	< 0.001
EMX2OS	GOLGA1	0.423	< 0.001
EMX2OS	AUH	0.608	< 0.001
EMX2OS	PKDREJ	0.403	< 0.001
EMX2OS	YTHDC1	0.603	< 0.001
EMX2OS	AP001652.1	0.465	< 0.001
EMX2OS	USP19	0.461	< 0.001
EMX2OS	KIF3B	0.44	< 0.001
EMX2OS	ZNF704	0.543	< 0.001
EMX2OS	AF064858.2	0.47	< 0.001
EMX2OS	ETFBKMT	0.458	< 0.001
EMX2OS	DNAJC27-AS1	0.472	< 0.001
EMX2OS	LHFPL3	0.584	< 0.001
EMX2OS	METTL25	0.412	< 0.001
EMX2OS	SEC24C	0.402	< 0.001
EMX2OS	CNNM3	0.601	< 0.001
EMX2OS	METAP1	0.403	< 0.001
EMX2OS	VSIG10	0.405	< 0.001
EMX2OS	AC068790.9	0.454	< 0.001
EMX2OS	SLC16A12	0.591	< 0.001
EMX2OS	FREM1	0.43	< 0.001
EMX2OS	NRXN2	0.453	< 0.001
EMX2OS	ZNF250	0.434	< 0.001
EMX2OS	AC103591.2	0.523	< 0.001
EMX2OS	ITGA6	0.526	< 0.001
EMX2OS	B3GALNT1	0.414	< 0.001
EMX2OS	CGN	0.476	< 0.001
EMX2OS	AC009486.1	0.467	< 0.001
EMX2OS	AP001528.2	0.449	< 0.001
EMX2OS	SLC27A2	0.624	< 0.001
EMX2OS	ACE2	0.504	< 0.001
EMX2OS	KLHL32	0.635	< 0.001
EMX2OS	NPY6R	0.416	< 0.001
EMX2OS	CYP4V2	0.546	< 0.001
EMX2OS	EPC2	0.406	< 0.001
EMX2OS	LRP2	0.566	< 0.001
EMX2OS	TBC1D4	0.438	< 0.001
EMX2OS	FZD1	0.467	< 0.001
EMX2OS	MFSD8	0.55	< 0.001
EMX2OS	ARNT	0.412	< 0.001
EMX2OS	IQUB	0.478	< 0.001
EMX2OS	STXBP1	0.603	< 0.001
EMX2OS	AC073254.1	0.434	< 0.001
EMX2OS	RCOR3	0.442	< 0.001
EMX2OS	LPP-AS2	0.416	< 0.001
EMX2OS	AC026369.1	0.408	< 0.001
EMX2OS	RBL2	0.41	< 0.001
EMX2OS	TOGARAM1	0.519	< 0.001
EMX2OS	NEMF	0.434	< 0.001
EMX2OS	TBC1D13	0.526	< 0.001
EMX2OS	FAM86C2P	0.466	< 0.001
EMX2OS	NUBPL	0.484	< 0.001
EMX2OS	ZBTB42	0.499	< 0.001
EMX2OS	TAPT1	0.566	< 0.001
EMX2OS	MFAP3L	0.437	< 0.001
EMX2OS	COX11	0.466	< 0.001
EMX2OS	ZRANB1	0.467	< 0.001
EMX2OS	AL592430.2	0.449	< 0.001
EMX2OS	PWAR5	0.477	< 0.001
EMX2OS	SPRY2	0.403	< 0.001
EMX2OS	PPP1R26	0.584	< 0.001
EMX2OS	GAB1	0.511	< 0.001
EMX2OS	SLC6A18	0.449	< 0.001
EMX2OS	GPR108	0.455	< 0.001
EMX2OS	EFCAB6	0.479	< 0.001
EMX2OS	ZNF260	0.457	< 0.001
EMX2OS	AL158070.2	0.53	< 0.001
EMX2OS	AC129507.2	0.434	< 0.001
EMX2OS	C17orf75	0.459	< 0.001
EMX2OS	SDHC	0.406	< 0.001
EMX2OS	TRMO	0.519	< 0.001
EMX2OS	KTN1	0.481	< 0.001
EMX2OS	MDN1	0.405	< 0.001
EMX2OS	TTF1	0.408	< 0.001
EMX2OS	BUD13	0.405	< 0.001
EMX2OS	THNSL1	0.404	< 0.001
EMX2OS	TMEM252	0.543	< 0.001
EMX2OS	LINC01886	0.421	< 0.001
EMX2OS	MED23	0.436	< 0.001
EMX2OS	NMRK1	0.405	< 0.001
EMX2OS	SF3B1	0.458	< 0.001
EMX2OS	PTPN3	0.594	< 0.001
EMX2OS	AQP7	0.446	< 0.001
EMX2OS	AC005670.3	0.426	< 0.001
EMX2OS	KLF9	0.489	< 0.001
EMX2OS	NAPEPLD	0.477	< 0.001
EMX2OS	CCDC43	0.482	< 0.001
EMX2OS	TGFBR2	0.411	< 0.001
EMX2OS	AP001628.2	0.459	< 0.001
EMX2OS	NR3C2	0.532	< 0.001
EMX2OS	IFT122	0.508	< 0.001
EMX2OS	EPB41L4A	0.557	< 0.001
EMX2OS	FANCC	0.611	< 0.001
EMX2OS	RFX3	0.422	< 0.001
EMX2OS	MRPS14	0.424	< 0.001
EMX2OS	C12orf49	0.494	< 0.001
EMX2OS	RCHY1	0.509	< 0.001
EMX2OS	SYNM	0.414	< 0.001
EMX2OS	PINK1	0.512	< 0.001
EMX2OS	ZNF620	0.401	< 0.001
EMX2OS	GLUD2	0.442	< 0.001
EMX2OS	SEPTIN7-AS1	0.575	< 0.001
EMX2OS	PER2	0.494	< 0.001
EMX2OS	PTPRK	0.433	< 0.001
EMX2OS	C18orf32	0.417	< 0.001
EMX2OS	ZNF697	0.566	< 0.001
EMX2OS	ZNF33A	0.509	< 0.001
EMX2OS	SLC35A3	0.481	< 0.001
EMX2OS	AC120114.1	0.5	< 0.001
EMX2OS	AC004112.1	0.411	< 0.001
EMX2OS	ELP1	0.49	< 0.001
EMX2OS	BLMH	0.442	< 0.001
EMX2OS	RETSAT	0.436	< 0.001
EMX2OS	ABHD17B	0.424	< 0.001
EMX2OS	MAP3K4	0.433	< 0.001
EMX2OS	CHRM3	0.409	< 0.001
EMX2OS	MECP2	0.489	< 0.001
EMX2OS	AASDH	0.442	< 0.001
EMX2OS	AC015909.5	0.408	< 0.001
EMX2OS	TNK1	0.574	< 0.001
EMX2OS	TP53INP2	0.412	< 0.001
EMX2OS	PRPF8	0.47	< 0.001
EMX2OS	AC099677.1	0.428	< 0.001
EMX2OS	VPS52	0.482	< 0.001
EMX2OS	PDZRN3	0.524	< 0.001
EMX2OS	BEND7	0.544	< 0.001
EMX2OS	CHAMP1	0.429	< 0.001
EMX2OS	AMDHD1	0.543	< 0.001
EMX2OS	DTWD2	0.412	< 0.001
EMX2OS	CC2D2A	0.509	< 0.001
EMX2OS	CLDN10	0.57	< 0.001
EMX2OS	SHROOM4	0.449	< 0.001
EMX2OS	SMG7-AS1	0.418	< 0.001
EMX2OS	U91328.1	0.672	< 0.001
EMX2OS	ENTPD5	0.434	< 0.001
EMX2OS	AP001372.2	0.413	< 0.001
EMX2OS	AC034206.1	0.445	< 0.001
EMX2OS	AP000355.1	0.422	< 0.001
EMX2OS	AP001486.2	0.484	< 0.001
EMX2OS	KLHDC7A	0.404	< 0.001
EMX2OS	BRPF3	0.53	< 0.001
EMX2OS	EGLN1	0.42	< 0.001
EMX2OS	NOP9	0.537	< 0.001
EMX2OS	SCN4B	0.406	< 0.001
EMX2OS	SPEN	0.511	< 0.001
EMX2OS	SPIRE1	0.413	< 0.001
EMX2OS	TPRG1L	0.518	< 0.001
EMX2OS	SURF6	0.414	< 0.001
EMX2OS	AQR	0.449	< 0.001
EMX2OS	GCC2	0.41	< 0.001
EMX2OS	SMG7	0.429	< 0.001
EMX2OS	ZSWIM5	0.58	< 0.001
EMX2OS	PRKAA2	0.605	< 0.001
EMX2OS	CDC42BPA	0.453	< 0.001
EMX2OS	TJP1	0.437	< 0.001
EMX2OS	TRIM44	0.42	< 0.001
EMX2OS	CPLANE2	0.539	< 0.001
EMX2OS	DIXDC1	0.439	< 0.001
EMX2OS	FBXO3	0.65	< 0.001
EMX2OS	USF3	0.409	< 0.001
EMX2OS	NCKAP1	0.401	< 0.001
EMX2OS	HIPK2	0.518	< 0.001
EMX2OS	AP1AR	0.525	< 0.001
EMX2OS	APOLD1	0.446	< 0.001
EMX2OS	PAFAH1B1	0.415	< 0.001
EMX2OS	SECISBP2L	0.492	< 0.001
EMX2OS	AL589745.1	0.442	< 0.001
EMX2OS	CYB5D1	0.583	< 0.001
EMX2OS	ZDHHC21	0.427	< 0.001
EMX2OS	ZER1	0.454	< 0.001
EMX2OS	CD300LG	0.441	< 0.001
EMX2OS	RNF40	0.426	< 0.001
EMX2OS	GPRASP2	0.538	< 0.001
EMX2OS	DYM	0.433	< 0.001
EMX2OS	SCN4A	0.556	< 0.001
EMX2OS	EMSY	0.408	< 0.001
EMX2OS	AC022400.9	0.495	< 0.001
EMX2OS	MTMR10	0.547	< 0.001
EMX2OS	TENT4B	0.427	< 0.001
EMX2OS	UCN3	0.408	< 0.001
EMX2OS	BCAR3-AS1	0.488	< 0.001
EMX2OS	ARHGAP24	0.647	< 0.001
EMX2OS	TSPYL1	0.537	< 0.001
EMX2OS	TMEM184C	0.449	< 0.001
EMX2OS	SFXN2	0.52	< 0.001
EMX2OS	MMAA	0.445	< 0.001
EMX2OS	SLC44A3	0.483	< 0.001
EMX2OS	ARHGAP32	0.677	< 0.001
EMX2OS	PGAP3	0.423	< 0.001
EMX2OS	CCDC198	0.545	< 0.001
EMX2OS	VPS54	0.437	< 0.001
EMX2OS	RN7SL726P	0.504	< 0.001
EMX2OS	KL	0.562	< 0.001
EMX2OS	COL18A1-AS1	0.512	< 0.001
EMX2OS	SLC25A30	0.499	< 0.001
EMX2OS	ALDH7A1	0.457	< 0.001
EMX2OS	PIP4K2B	0.432	< 0.001
EMX2OS	JMJD1C	0.489	< 0.001
EMX2OS	SLC28A1	0.423	< 0.001
EMX2OS	DSCAML1	0.433	< 0.001
EMX2OS	RNU6-485P	0.423	< 0.001
EMX2OS	PAIP2B	0.674	< 0.001
EMX2OS	SECISBP2	0.536	< 0.001
EMX2OS	CALCOCO1	0.508	< 0.001
EMX2OS	KCNN3	0.423	< 0.001
EMX2OS	THRB	0.422	< 0.001
EMX2OS	IKZF5	0.541	< 0.001
EMX2OS	WLS	0.457	< 0.001
EMX2OS	DYNC1I2	0.449	< 0.001
EMX2OS	AL033381.1	0.463	< 0.001
EMX2OS	AL109615.1	0.428	< 0.001
EMX2OS	AGTR1	0.515	< 0.001
EMX2OS	AFF3	0.428	< 0.001
EMX2OS	GMPR2	0.498	< 0.001
EMX2OS	PKD2	0.497	< 0.001
EMX2OS	AC008543.1	0.422	< 0.001
EMX2OS	AC025627.1	0.484	< 0.001
EMX2OS	EGOT	0.585	< 0.001
EMX2OS	AR	0.447	< 0.001
EMX2OS	BBOX1	0.485	< 0.001
EMX2OS	IBA57	0.559	< 0.001
EMX2OS	AC116025.1	0.463	< 0.001
EMX2OS	APC	0.441	< 0.001
EMX2OS	GLIS3	0.431	< 0.001
EMX2OS	ZNF292	0.415	< 0.001
EMX2OS	SYNE2	0.577	< 0.001
EMX2OS	DYNC2H1	0.603	< 0.001
EMX2OS	ABAT	0.442	< 0.001
EMX2OS	FAXDC2	0.424	< 0.001
EMX2OS	CDK18	0.406	< 0.001
EMX2OS	TSPAN7	0.404	< 0.001
EMX2OS	FBXO48	0.551	< 0.001
EMX2OS	AL359715.3	0.422	< 0.001
EMX2OS	PLEKHA2	0.403	< 0.001
EMX2OS	ZSCAN18	0.431	< 0.001
EMX2OS	ZNF649	0.408	< 0.001
EMX2OS	KCNJ15	0.562	< 0.001
EMX2OS	EXOSC2	0.415	< 0.001
EMX2OS	ADD3	0.554	< 0.001
EMX2OS	KLF15	0.42	< 0.001
EMX2OS	AC231533.2	0.421	< 0.001
EMX2OS	FAR2P2	0.42	< 0.001
EMX2OS	PRMT5	0.476	< 0.001
EMX2OS	ZBTB4	0.553	< 0.001
EMX2OS	ZNF184	0.418	< 0.001
EMX2OS	UTP14C	0.543	< 0.001
EMX2OS	LIN7C	0.468	< 0.001
EMX2OS	RPUSD4	0.401	< 0.001
EMX2OS	RAB11FIP3	0.441	< 0.001
EMX2OS	ZNF155	0.453	< 0.001
EMX2OS	NEBL	0.552	< 0.001
EMX2OS	ATG14	0.441	< 0.001
EMX2OS	TRIB2	0.414	< 0.001
EMX2OS	BDNF-AS	0.47	< 0.001
EMX2OS	NUMA1	0.457	< 0.001
EMX2OS	CPT1A	0.589	< 0.001
EMX2OS	INSYN2B	0.46	< 0.001
EMX2OS	GGNBP2	0.52	< 0.001
EMX2OS	C20orf194	0.53	< 0.001
EMX2OS	KCTD2	0.464	< 0.001
EMX2OS	WASHC2A	0.467	< 0.001
EMX2OS	AL353803.2	0.477	< 0.001
EMX2OS	ALDH6A1	0.699	< 0.001
EMX2OS	ATL2	0.472	< 0.001
EMX2OS	LIFR	0.616	< 0.001
EMX2OS	ZC3H7B	0.492	< 0.001
EMX2OS	MAPK10	0.459	< 0.001
EMX2OS	IL17RD	0.7	< 0.001
EMX2OS	NBPF1	0.525	< 0.001
EMX2OS	AC091286.1	0.475	< 0.001
EMX2OS	ZNF507	0.422	< 0.001
EMX2OS	DNMBP	0.412	< 0.001
EMX2OS	ZNF592	0.567	< 0.001
EMX2OS	PIGF	0.402	< 0.001
EMX2OS	SCRN3	0.437	< 0.001
EMX2OS	RUNDC3B	0.483	< 0.001
EMX2OS	AMOTL1	0.411	< 0.001
EMX2OS	SLC47A1	0.649	< 0.001
EMX2OS	FZD4	0.493	< 0.001
EMX2OS	MRPL50	0.5	< 0.001
EMX2OS	RAB17	0.443	< 0.001
EMX2OS	CHST9	0.417	< 0.001
EMX2OS	GAREM1	0.681	< 0.001
EMX2OS	CLMN	0.506	< 0.001
EMX2OS	TBC1D15	0.463	< 0.001
EMX2OS	PPP2R1B	0.401	< 0.001
EMX2OS	SLC46A1	0.446	< 0.001
EMX2OS	CECR3	0.429	< 0.001
EMX2OS	EPN2	0.492	< 0.001
EMX2OS	ATP6V0A1	0.498	< 0.001
EMX2OS	ZNF366	0.403	< 0.001
EMX2OS	OTUD7A	0.528	< 0.001
EMX2OS	AUTS2	0.509	< 0.001
EMX2OS	MXI1	0.576	< 0.001
EMX2OS	AC005562.1	0.485	< 0.001
EMX2OS	RBM8A	0.404	< 0.001
EMX2OS	ADORA2A-AS1	0.512	< 0.001
EMX2OS	ARHGEF40	0.482	< 0.001
EMX2OS	IFNLR1	0.529	< 0.001
EMX2OS	DOP1A	0.433	< 0.001
EMX2OS	COX20	0.402	< 0.001
EMX2OS	AC005498.3	0.454	< 0.001
EMX2OS	CCNYL1	0.427	< 0.001
EMX2OS	ZNF441	0.462	< 0.001
EMX2OS	ZNF433	0.578	< 0.001
EMX2OS	ZNF252P	0.445	< 0.001
EMX2OS	HLF	0.617	< 0.001
EMX2OS	CPEB4	0.406	< 0.001
EMX2OS	FBXL5	0.511	< 0.001
EMX2OS	SNED1	0.404	< 0.001
EMX2OS	ZFYVE9	0.582	< 0.001
EMX2OS	ANAPC16	0.486	< 0.001
EMX2OS	MARCHF6	0.477	< 0.001
EMX2OS	ZNF594	0.458	< 0.001
EMX2OS	WDR5	0.416	< 0.001
EMX2OS	EHBP1	0.485	< 0.001
EMX2OS	AL163636.3	0.472	< 0.001
EMX2OS	KIF12	0.44	< 0.001
EMX2OS	HDHD2	0.565	< 0.001
EMX2OS	HADHB	0.443	< 0.001
EMX2OS	SLC6A19	0.506	< 0.001
EMX2OS	CWC22	0.492	< 0.001
EMX2OS	TRIM2	0.478	< 0.001
EMX2OS	PPFIA1	0.405	< 0.001
EMX2OS	ACSS1	0.459	< 0.001
EMX2OS	AC113608.1	0.42	< 0.001
EMX2OS	PLEKHH1	0.483	< 0.001
EMX2OS	QRFPR	0.408	< 0.001
EMX2OS	HELQ	0.468	< 0.001
EMX2OS	AC139769.1	0.518	< 0.001
EMX2OS	AC002310.5	0.409	< 0.001
EMX2OS	LINC02275	0.548	< 0.001
EMX2OS	GRHPR	0.416	< 0.001
EMX2OS	PRXL2A	0.556	< 0.001
EMX2OS	HSPA4L	0.55	< 0.001
EMX2OS	MPI	0.493	< 0.001
EMX2OS	ANKRD33B	0.412	< 0.001
EMX2OS	EIF3A	0.43	< 0.001
EMX2OS	ARSD	0.416	< 0.001
EMX2OS	PATZ1	0.467	< 0.001
EMX2OS	SHLD2	0.437	< 0.001
EMX2OS	FAM161B	0.58	< 0.001
EMX2OS	ESPN	0.539	< 0.001
EMX2OS	VPS13A	0.499	< 0.001
EMX2OS	FAM120B	0.436	< 0.001
EMX2OS	PRPSAP2	0.526	< 0.001
EMX2OS	PLPP1	0.42	< 0.001
EMX2OS	KLF11	0.484	< 0.001
EMX2OS	AL603750.1	0.424	< 0.001
EMX2OS	AC022107.1	0.54	< 0.001
EMX2OS	TBCK	0.486	< 0.001
EMX2OS	BTRC	0.58	< 0.001
EMX2OS	SPAG9	0.639	< 0.001
EMX2OS	PBLD	0.522	< 0.001
EMX2OS	HINT3	0.437	< 0.001
EMX2OS	TTLL5	0.437	< 0.001
EMX2OS	CASC1	0.433	< 0.001
EMX2OS	ANKS1A	0.533	< 0.001
EMX2OS	BTBD8	0.42	< 0.001
EMX2OS	ADHFE1	0.417	< 0.001
EMX2OS	GDF6	0.405	< 0.001
EMX2OS	ACADL	0.543	< 0.001
EMX2OS	MPPE1	0.43	< 0.001
EMX2OS	ZC2HC1C	0.538	< 0.001
EMX2OS	PGPEP1	0.553	< 0.001
EMX2OS	ASXL3	0.587	< 0.001
EMX2OS	RHOB	0.426	< 0.001
EMX2OS	EIF4E3	0.404	< 0.001
EMX2OS	MPHOSPH8	0.554	< 0.001
EMX2OS	STUM	0.491	< 0.001
EMX2OS	AMOT	0.594	< 0.001
EMX2OS	TTC28	0.483	< 0.001
EMX2OS	AC147651.2	0.455	< 0.001
EMX2OS	C6orf47	0.426	< 0.001
EMX2OS	MARC2	0.486	< 0.001
EMX2OS	RC3H1	0.418	< 0.001
EMX2OS	CEACAM1	0.419	< 0.001
EMX2OS	HYAL1	0.421	< 0.001
EMX2OS	AIF1L	0.419	< 0.001
EMX2OS	METTL24	0.463	< 0.001
EMX2OS	ADM2	0.412	< 0.001
EMX2OS	AFG1L	0.464	< 0.001
EMX2OS	DLST	0.478	< 0.001
EMX2OS	HNMT	0.474	< 0.001
EMX2OS	PTPN13	0.491	< 0.001
EMX2OS	NLRP14	0.547	< 0.001
EMX2OS	RETREG2	0.42	< 0.001
EMX2OS	CLVS2	0.445	< 0.001
EMX2OS	AP000866.1	0.416	< 0.001
EMX2OS	RNF185	0.432	< 0.001
EMX2OS	CDADC1	0.697	< 0.001
EMX2OS	IRAK1BP1	0.405	< 0.001
EMX2OS	C6orf89	0.475	< 0.001
EMX2OS	MYL3	0.538	< 0.001
EMX2OS	ATE1	0.5	< 0.001
EMX2OS	TGFBR3	0.479	< 0.001
EMX2OS	AL049834.1	0.451	< 0.001
EMX2OS	SNX9	0.435	< 0.001
EMX2OS	PTCSC3	0.435	< 0.001
EMX2OS	PHYHIPL	0.585	< 0.001
EMX2OS	BPHL	0.605	< 0.001
EMX2OS	CNNM2	0.507	< 0.001
EMX2OS	AL080248.1	0.414	< 0.001
EMX2OS	ZNF395	0.445	< 0.001
EMX2OS	SGMS1	0.405	< 0.001
EMX2OS	HNF1A	0.482	< 0.001
EMX2OS	FMO1	0.52	< 0.001
EMX2OS	UBE3D	0.447	< 0.001
EMX2OS	MEF2A	0.42	< 0.001
EMX2OS	SIN3A	0.408	< 0.001
EMX2OS	BSPRY	0.427	< 0.001
EMX2OS	IREB2	0.428	< 0.001
EMX2OS	GFOD2	0.477	< 0.001
EMX2OS	ZNF45	0.47	< 0.001
EMX2OS	LMBRD1	0.528	< 0.001
EMX2OS	CDKL1	0.599	< 0.001
EMX2OS	AL356273.6	0.514	< 0.001
EMX2OS	MRPS31P4	0.478	< 0.001
EMX2OS	AL132780.2	0.449	< 0.001
EMX2OS	RLF	0.408	< 0.001
EMX2OS	RNF19B	0.474	< 0.001
EMX2OS	EXOC8	0.47	< 0.001
EMX2OS	SBF2	0.529	< 0.001
EMX2OS	MED9	0.478	< 0.001
EMX2OS	C4orf19	0.431	< 0.001
EMX2OS	GOSR1	0.539	< 0.001
EMX2OS	ATP1A1-AS1	0.599	< 0.001
EMX2OS	CYB5A	0.416	< 0.001
EMX2OS	NBR1	0.57	< 0.001
EMX2OS	CYB5RL	0.461	< 0.001
EMX2OS	CCDC149	0.459	< 0.001
EMX2OS	SNX1	0.576	< 0.001
EMX2OS	SLC13A1	0.457	< 0.001
EMX2OS	KIAA1671	0.472	< 0.001
EMX2OS	RAB3IP	0.649	< 0.001
EMX2OS	LINC01521	0.412	< 0.001
EMX2OS	PHYH	0.517	< 0.001
EMX2OS	SHANK3	0.416	< 0.001
EMX2OS	AC078864.1	0.469	< 0.001
EMX2OS	C21orf62-AS1	0.411	< 0.001
EMX2OS	RGP1	0.58	< 0.001
EMX2OS	CHDH	0.573	< 0.001
EMX2OS	BAHD1	0.531	< 0.001
EMX2OS	SMCR8	0.441	< 0.001
EMX2OS	RAPGEF1	0.421	< 0.001
EMX2OS	MORN1	0.503	< 0.001
EMX2OS	KHNYN	0.433	< 0.001
EMX2OS	SH2D4A	0.441	< 0.001
EMX2OS	DOCK1	0.523	< 0.001
EMX2OS	GALK2	0.489	< 0.001
EMX2OS	PTGR2	0.549	< 0.001
EMX2OS	GLOD4	0.532	< 0.001
EMX2OS	HOMEZ	0.561	< 0.001
EMX2OS	CHD9	0.517	< 0.001
EMX2OS	PABPC4L	0.482	< 0.001
EMX2OS	AC022424.1	0.435	< 0.001
EMX2OS	SLC25A21	0.472	< 0.001
EMX2OS	COG3	0.462	< 0.001
EMX2OS	PDE2A	0.417	< 0.001
EMX2OS	AC027612.1	0.504	< 0.001
EMX2OS	ARHGAP5-AS1	0.426	< 0.001
EMX2OS	PUM1	0.469	< 0.001
EMX2OS	ZNF790	0.418	< 0.001
EMX2OS	RBM47	0.448	< 0.001
EMX2OS	YPEL2	0.446	< 0.001
EMX2OS	SARAF	0.43	< 0.001
EMX2OS	MARF1	0.493	< 0.001
EMX2OS	NUP62CL	0.419	< 0.001
EMX2OS	ZC3H14	0.458	< 0.001
EMX2OS	MICU1	0.586	< 0.001
EMX2OS	EPAS1	0.403	< 0.001
EMX2OS	IVNS1ABP	0.59	< 0.001
EMX2OS	ZBTB5	0.514	< 0.001
EMX2OS	RGS9	0.486	< 0.001
EMX2OS	ATXN1L	0.591	< 0.001
EMX2OS	TTLL11	0.453	< 0.001
EMX2OS	BBS12	0.415	< 0.001
EMX2OS	DDX1	0.478	< 0.001
EMX2OS	AC138207.8	0.42	< 0.001
EMX2OS	CFAP57	0.427	< 0.001
EMX2OS	DYNC2LI1	0.45	< 0.001
EMX2OS	AC079848.1	0.469	< 0.001
EMX2OS	ZNF844	0.569	< 0.001
EMX2OS	SP2	0.524	< 0.001
EMX2OS	CBR4	0.463	< 0.001
EMX2OS	TRMT2B	0.437	< 0.001
EMX2OS	MINDY3	0.435	< 0.001
EMX2OS	PLRG1	0.528	< 0.001
EMX2OS	TRIM10	0.511	< 0.001
EMX2OS	TRAF3IP1	0.434	< 0.001
EMX2OS	TECPR2	0.52	< 0.001
EMX2OS	BBS9	0.481	< 0.001
EMX2OS	HUNK	0.42	< 0.001
EMX2OS	KBTBD7	0.459	< 0.001
EMX2OS	SYNJ2BP	0.539	< 0.001
EMX2OS	TEAD1	0.462	< 0.001
EMX2OS	SIK2	0.599	< 0.001
EMX2OS	AL136981.2	0.429	< 0.001
EMX2OS	HNRNPU	0.421	< 0.001
EMX2OS	SLC10A5	0.415	< 0.001
EMX2OS	RAP2C-AS1	0.477	< 0.001
EMX2OS	KIDINS220	0.557	< 0.001
EMX2OS	FAM149A	0.477	< 0.001
EMX2OS	AP2A2	0.507	< 0.001
EMX2OS	PER3	0.534	< 0.001
EMX2OS	GABRG1	0.42	< 0.001
EMX2OS	ZNF830	0.489	< 0.001
EMX2OS	BOC	0.456	< 0.001
EMX2OS	AP000229.1	0.533	< 0.001
EMX2OS	ARHGEF37	0.584	< 0.001
EMX2OS	PIGH	0.467	< 0.001
EMX2OS	L2HGDH	0.603	< 0.001
EMX2OS	SULT1C4	0.553	< 0.001
EMX2OS	FOXO3	0.47	< 0.001
EMX2OS	MRPS18B	0.498	< 0.001
EMX2OS	SNX30	0.567	< 0.001
EMX2OS	CD2AP	0.447	< 0.001
EMX2OS	POLI	0.462	< 0.001
EMX2OS	MAPT-IT1	0.468	< 0.001
EMX2OS	GIGYF2	0.554	< 0.001
EMX2OS	SPRYD7	0.524	< 0.001
EMX2OS	C11orf54	0.548	< 0.001
EMX2OS	LINC00235	0.419	< 0.001
EMX2OS	FUBP1	0.417	< 0.001
EMX2OS	GBA3	0.627	< 0.001
EMX2OS	ZNF407	0.462	< 0.001
EMX2OS	BCKDHB	0.505	< 0.001
EMX2OS	DSG2	0.403	< 0.001
EMX2OS	AC026396.1	0.491	< 0.001
EMX2OS	SPG11	0.465	< 0.001
EMX2OS	ANK3	0.6	< 0.001
EMX2OS	GPANK1	0.431	< 0.001
EMX2OS	PDE7B	0.482	< 0.001
EMX2OS	SLC25A44	0.512	< 0.001
EMX2OS	SPATA5L1	0.414	< 0.001
EMX2OS	GNE	0.595	< 0.001
EMX2OS	WIPF2	0.566	< 0.001
EMX2OS	AC068051.1	0.51	< 0.001
EMX2OS	TARS3	0.492	< 0.001
EMX2OS	HOXC10	0.402	< 0.001
EMX2OS	IL6R	0.478	< 0.001
EMX2OS	USP51	0.441	< 0.001
EMX2OS	AC063919.1	0.571	< 0.001
EMX2OS	ACAA2	0.697	< 0.001
EMX2OS	AFF1	0.517	< 0.001
EMX2OS	ALMS1P1	0.483	< 0.001
EMX2OS	TRIM13	0.525	< 0.001
EMX2OS	NEK11	0.403	< 0.001
EMX2OS	AC025627.2	0.404	< 0.001
EMX2OS	PSIP1	0.45	< 0.001
EMX2OS	AC021087.1	0.423	< 0.001
EMX2OS	UNC13B	0.518	< 0.001
EMX2OS	RNF13	0.401	< 0.001
EMX2OS	SPX	0.414	< 0.001
EMX2OS	TNS1	0.529	< 0.001
EMX2OS	USH1C	0.466	< 0.001
EMX2OS	POMT2	0.459	< 0.001
EMX2OS	DYNC1LI2	0.409	< 0.001
EMX2OS	TTC38	0.407	< 0.001
EMX2OS	MDC1	0.416	< 0.001
EMX2OS	FAM168B	0.515	< 0.001
EMX2OS	ITGA9-AS1	0.43	< 0.001
EMX2OS	ZNF549	0.421	< 0.001
EMX2OS	VPS13B	0.438	< 0.001
EMX2OS	DAB2IP	0.44	< 0.001
EMX2OS	AL772337.1	0.433	< 0.001
EMX2OS	AC009053.4	0.587	< 0.001
EMX2OS	EDA	0.439	< 0.001
EMX2OS	IPP	0.503	< 0.001
EMX2OS	LINC00671	0.573	< 0.001
EMX2OS	KDM3B	0.479	< 0.001
EMX2OS	LIN7A	0.576	< 0.001
EMX2OS	ZFP1	0.43	< 0.001
EMX2OS	SLC35F5	0.428	< 0.001
EMX2OS	AL359915.1	0.533	< 0.001
EMX2OS	PLEKHA7	0.747	< 0.001
EMX2OS	FGF14-AS2	0.447	< 0.001
EMX2OS	PRELID1P2	0.432	< 0.001
EMX2OS	GYPA	0.428	< 0.001
EMX2OS	PPP2R2D	0.417	< 0.001
EMX2OS	ZFYVE1	0.419	< 0.001
EMX2OS	ECPAS	0.416	< 0.001
EMX2OS	GHR	0.446	< 0.001
EMX2OS	C11orf52	0.446	< 0.001
EMX2OS	ZNF568	0.419	< 0.001
EMX2OS	LINC00476	0.402	< 0.001
EMX2OS	KLHDC1	0.438	< 0.001
EMX2OS	MYORG	0.426	< 0.001
EMX2OS	AL050309.1	0.489	< 0.001
EMX2OS	KIF3A	0.431	< 0.001
EMX2OS	SGMS1-AS1	0.549	< 0.001
EMX2OS	DCTN6	0.463	< 0.001
EMX2OS	WDFY3-AS2	0.572	< 0.001
EMX2OS	BLOC1S5	0.443	< 0.001
EMX2OS	NCOA1	0.438	< 0.001
EMX2OS	PLEKHA1	0.478	< 0.001
EMX2OS	LINC01948	0.448	< 0.001
EMX2OS	UBR3	0.476	< 0.001
EMX2OS	OPHN1	0.481	< 0.001
EMX2OS	ANKRD46	0.437	< 0.001
EMX2OS	DBT	0.554	< 0.001
EMX2OS	CRY2	0.713	< 0.001
EMX2OS	ANKFY1	0.42	< 0.001
EMX2OS	HAO2	0.559	< 0.001
EMX2OS	KAZN	0.61	< 0.001
EMX2OS	ALDH1L1	0.618	< 0.001
EMX2OS	PAQR5	0.575	< 0.001
EMX2OS	MAML3	0.406	< 0.001
EMX2OS	GPAT3	0.559	< 0.001
EMX2OS	BORCS7	0.462	< 0.001
EMX2OS	AJAP1	0.489	< 0.001
EMX2OS	WDR37	0.411	< 0.001
EMX2OS	PDPR	0.444	< 0.001
EMX2OS	C1orf229	0.46	< 0.001
EMX2OS	CYP4A11	0.555	< 0.001
EMX2OS	BDH2	0.554	< 0.001
EMX2OS	GRB10	0.433	< 0.001
EMX2OS	KLF8	0.481	< 0.001
EMX2OS	DIP2C	0.607	< 0.001
EMX2OS	FAM8A1	0.469	< 0.001
EMX2OS	SLC13A2	0.461	< 0.001
EMX2OS	CHIC1	0.475	< 0.001
EMX2OS	SATB2-AS1	0.449	< 0.001
EMX2OS	LINC01671	0.532	< 0.001
EMX2OS	SNX29	0.612	< 0.001
EMX2OS	AL035413.1	0.612	< 0.001
EMX2OS	APOM	0.417	< 0.001
EMX2OS	FBXO7	0.473	< 0.001
EMX2OS	OSCP1	0.429	< 0.001
EMX2OS	AL355997.1	0.557	< 0.001
EMX2OS	CIT	0.407	< 0.001
EMX2OS	VPS26A	0.423	< 0.001
EMX2OS	NFIA	0.46	< 0.001
EMX2OS	ZNF510	0.419	< 0.001
EMX2OS	ZNF274	0.484	< 0.001
EMX2OS	GIPC2	0.595	< 0.001
EMX2OS	ST6GALNAC3	0.405	< 0.001
EMX2OS	CD46	0.451	< 0.001
EMX2OS	DNAJC22	0.458	< 0.001
EMX2OS	ST13	0.42	< 0.001
EMX2OS	GALNT15	0.413	< 0.001
EMX2OS	BCAR3	0.482	< 0.001
EMX2OS	SLC39A9	0.414	< 0.001
EMX2OS	LINC00674	0.414	< 0.001
EMX2OS	MYO3A	0.434	< 0.001
EMX2OS	SIRT3	0.571	< 0.001
EMX2OS	GOLIM4	0.419	< 0.001
EMX2OS	MICAL3	0.548	< 0.001
EMX2OS	LSM14B	0.408	< 0.001
EMX2OS	CABLES1	0.633	< 0.001
EMX2OS	MYLIP	0.515	< 0.001
EMX2OS	MTHFD1	0.481	< 0.001
EMX2OS	PATJ	0.694	< 0.001
EMX2OS	AC008669.1	0.468	< 0.001
EMX2OS	PPP6R3	0.426	< 0.001
EMX2OS	ERLIN2	0.509	< 0.001
EMX2OS	LINC01508	0.484	< 0.001
EMX2OS	BRD2	0.456	< 0.001
EMX2OS	FAM50B	0.468	< 0.001
EMX2OS	EIF1AXP1	0.415	< 0.001
EMX2OS	WDFY3	0.579	< 0.001
EMX2OS	ZNF737	0.482	< 0.001
EMX2OS	FBXO34	0.576	< 0.001
[truncated: 126 more rows]
